# Supplementary figures and images for: Higher‐order oligomerization promotes localization of SPOP to liquid nuclear speckles
Source: PubMed Central journal article supplement — EMBO J. 2016 May 24;35(12):1254–75. doi: 10.15252/embj.201593169 (PMC4910529; doi:10.15252/embj.201593169), 2016-05-24

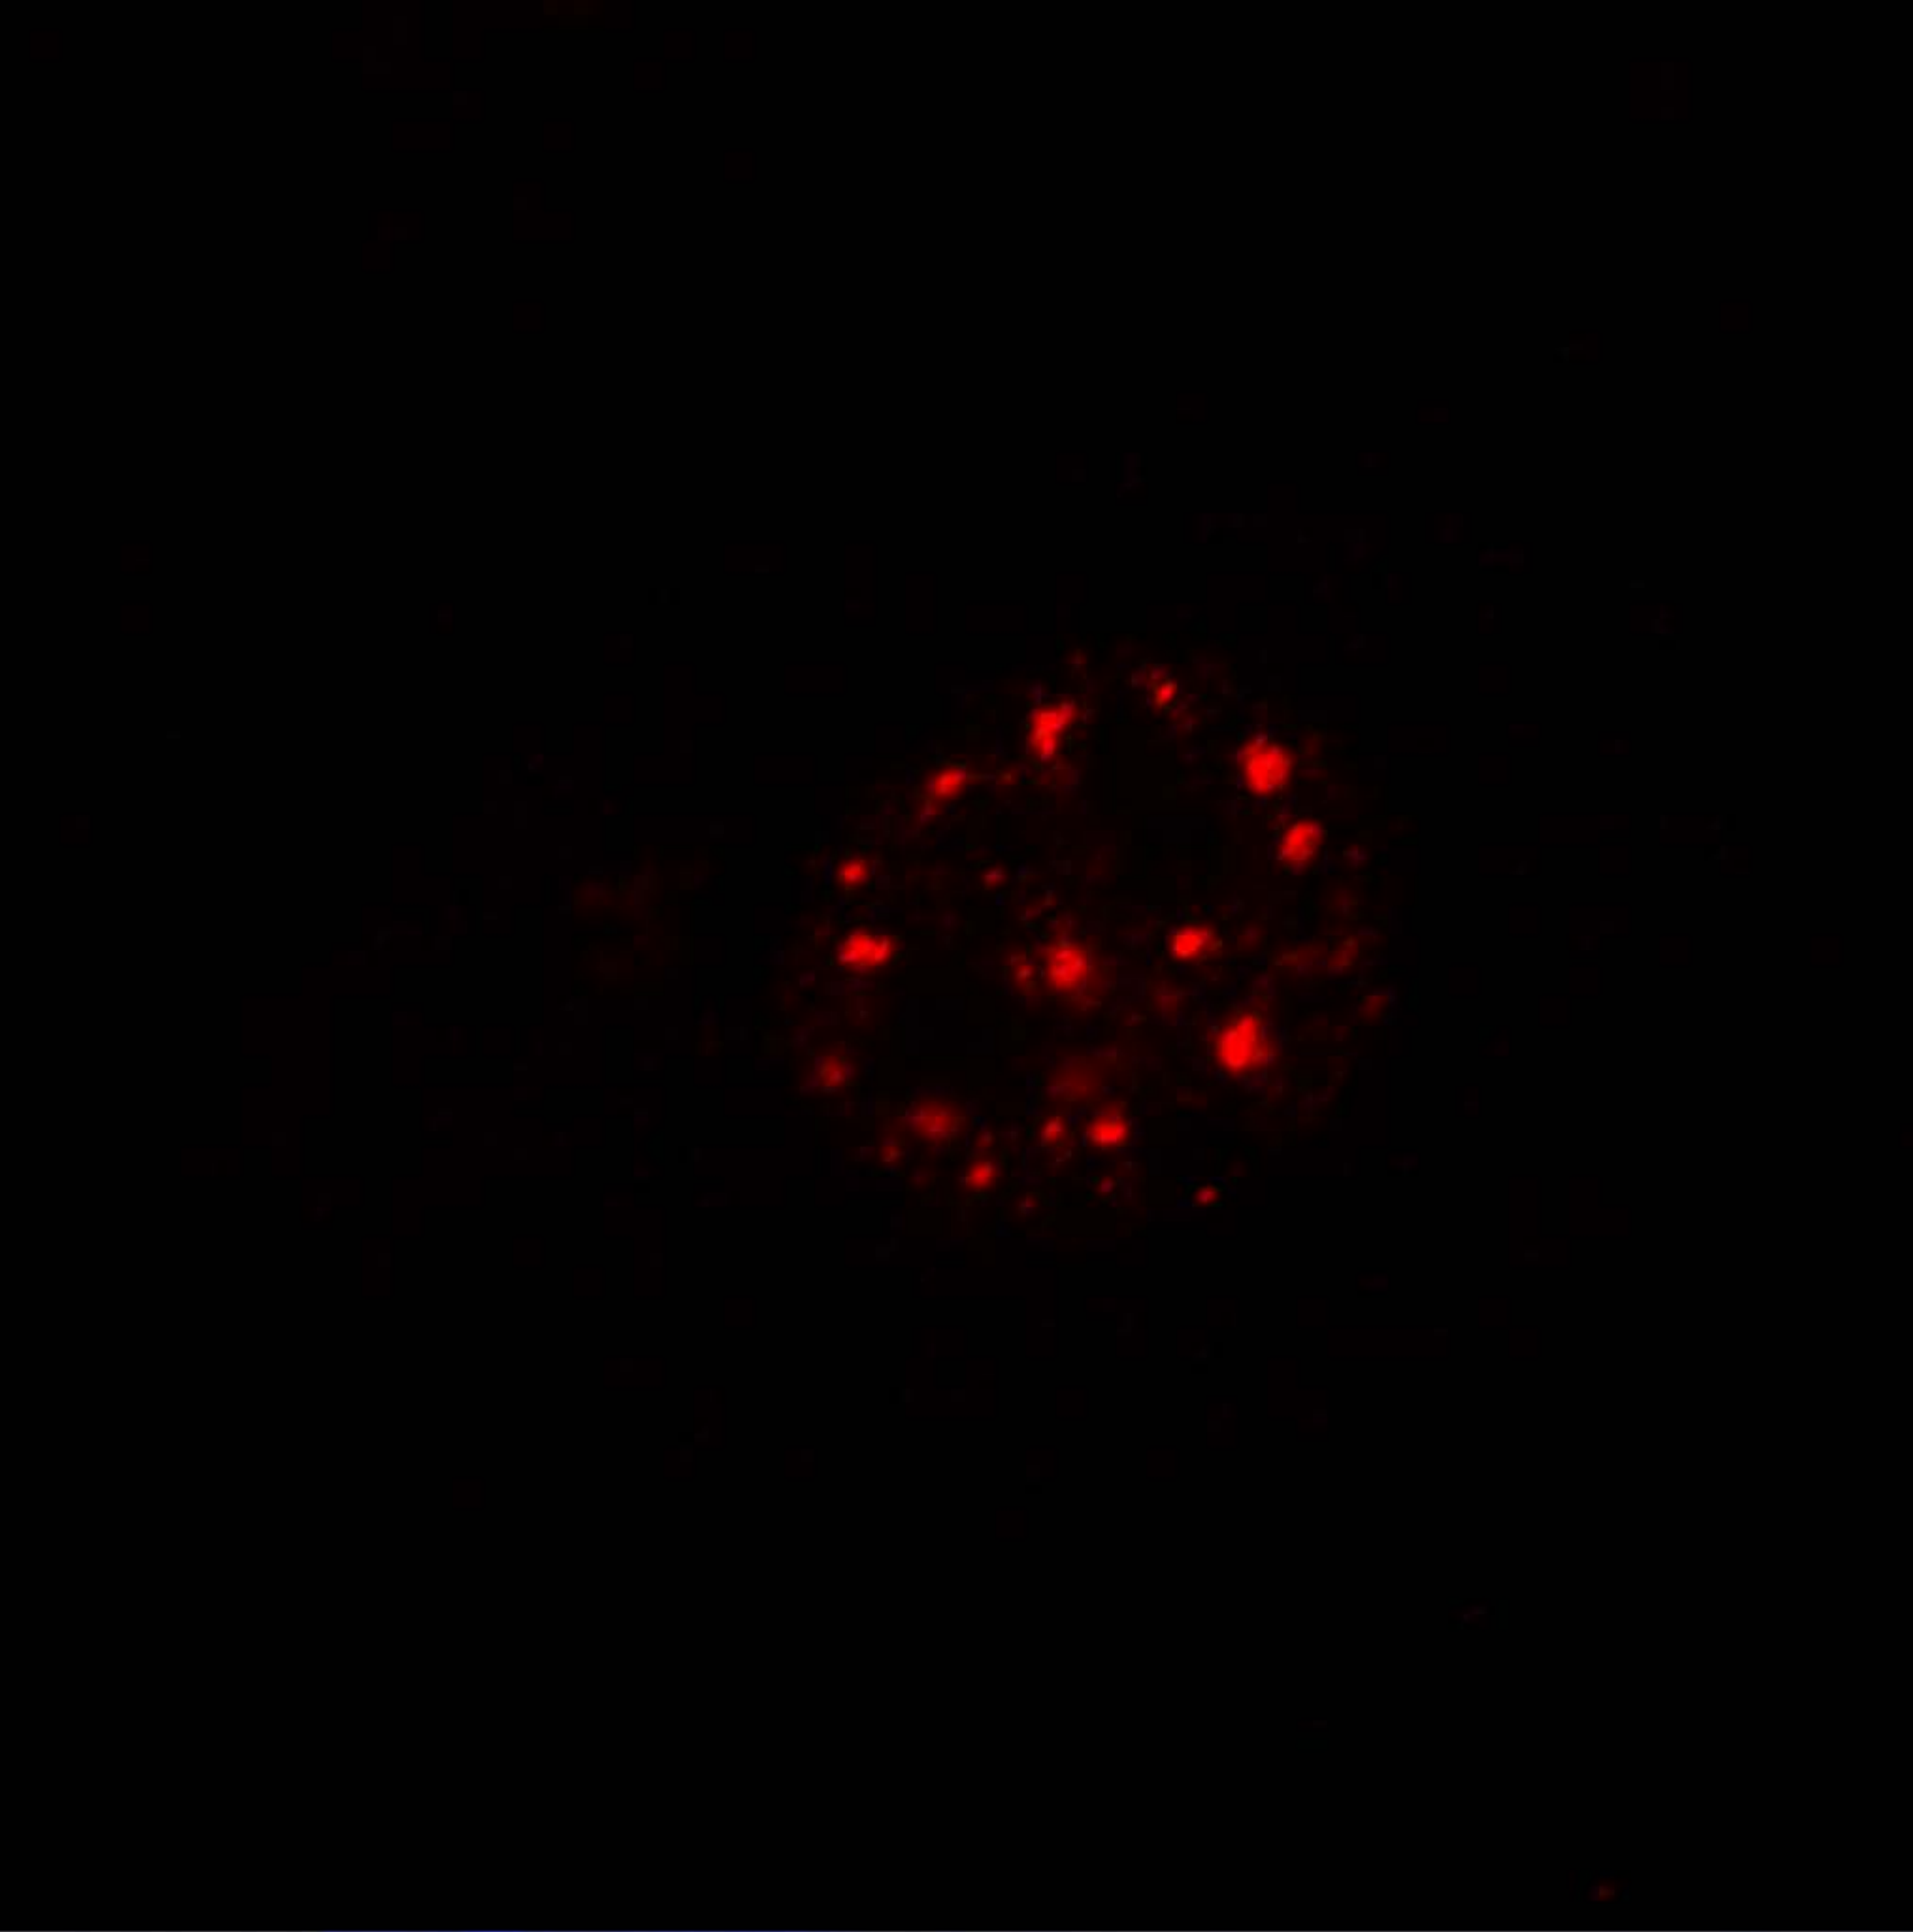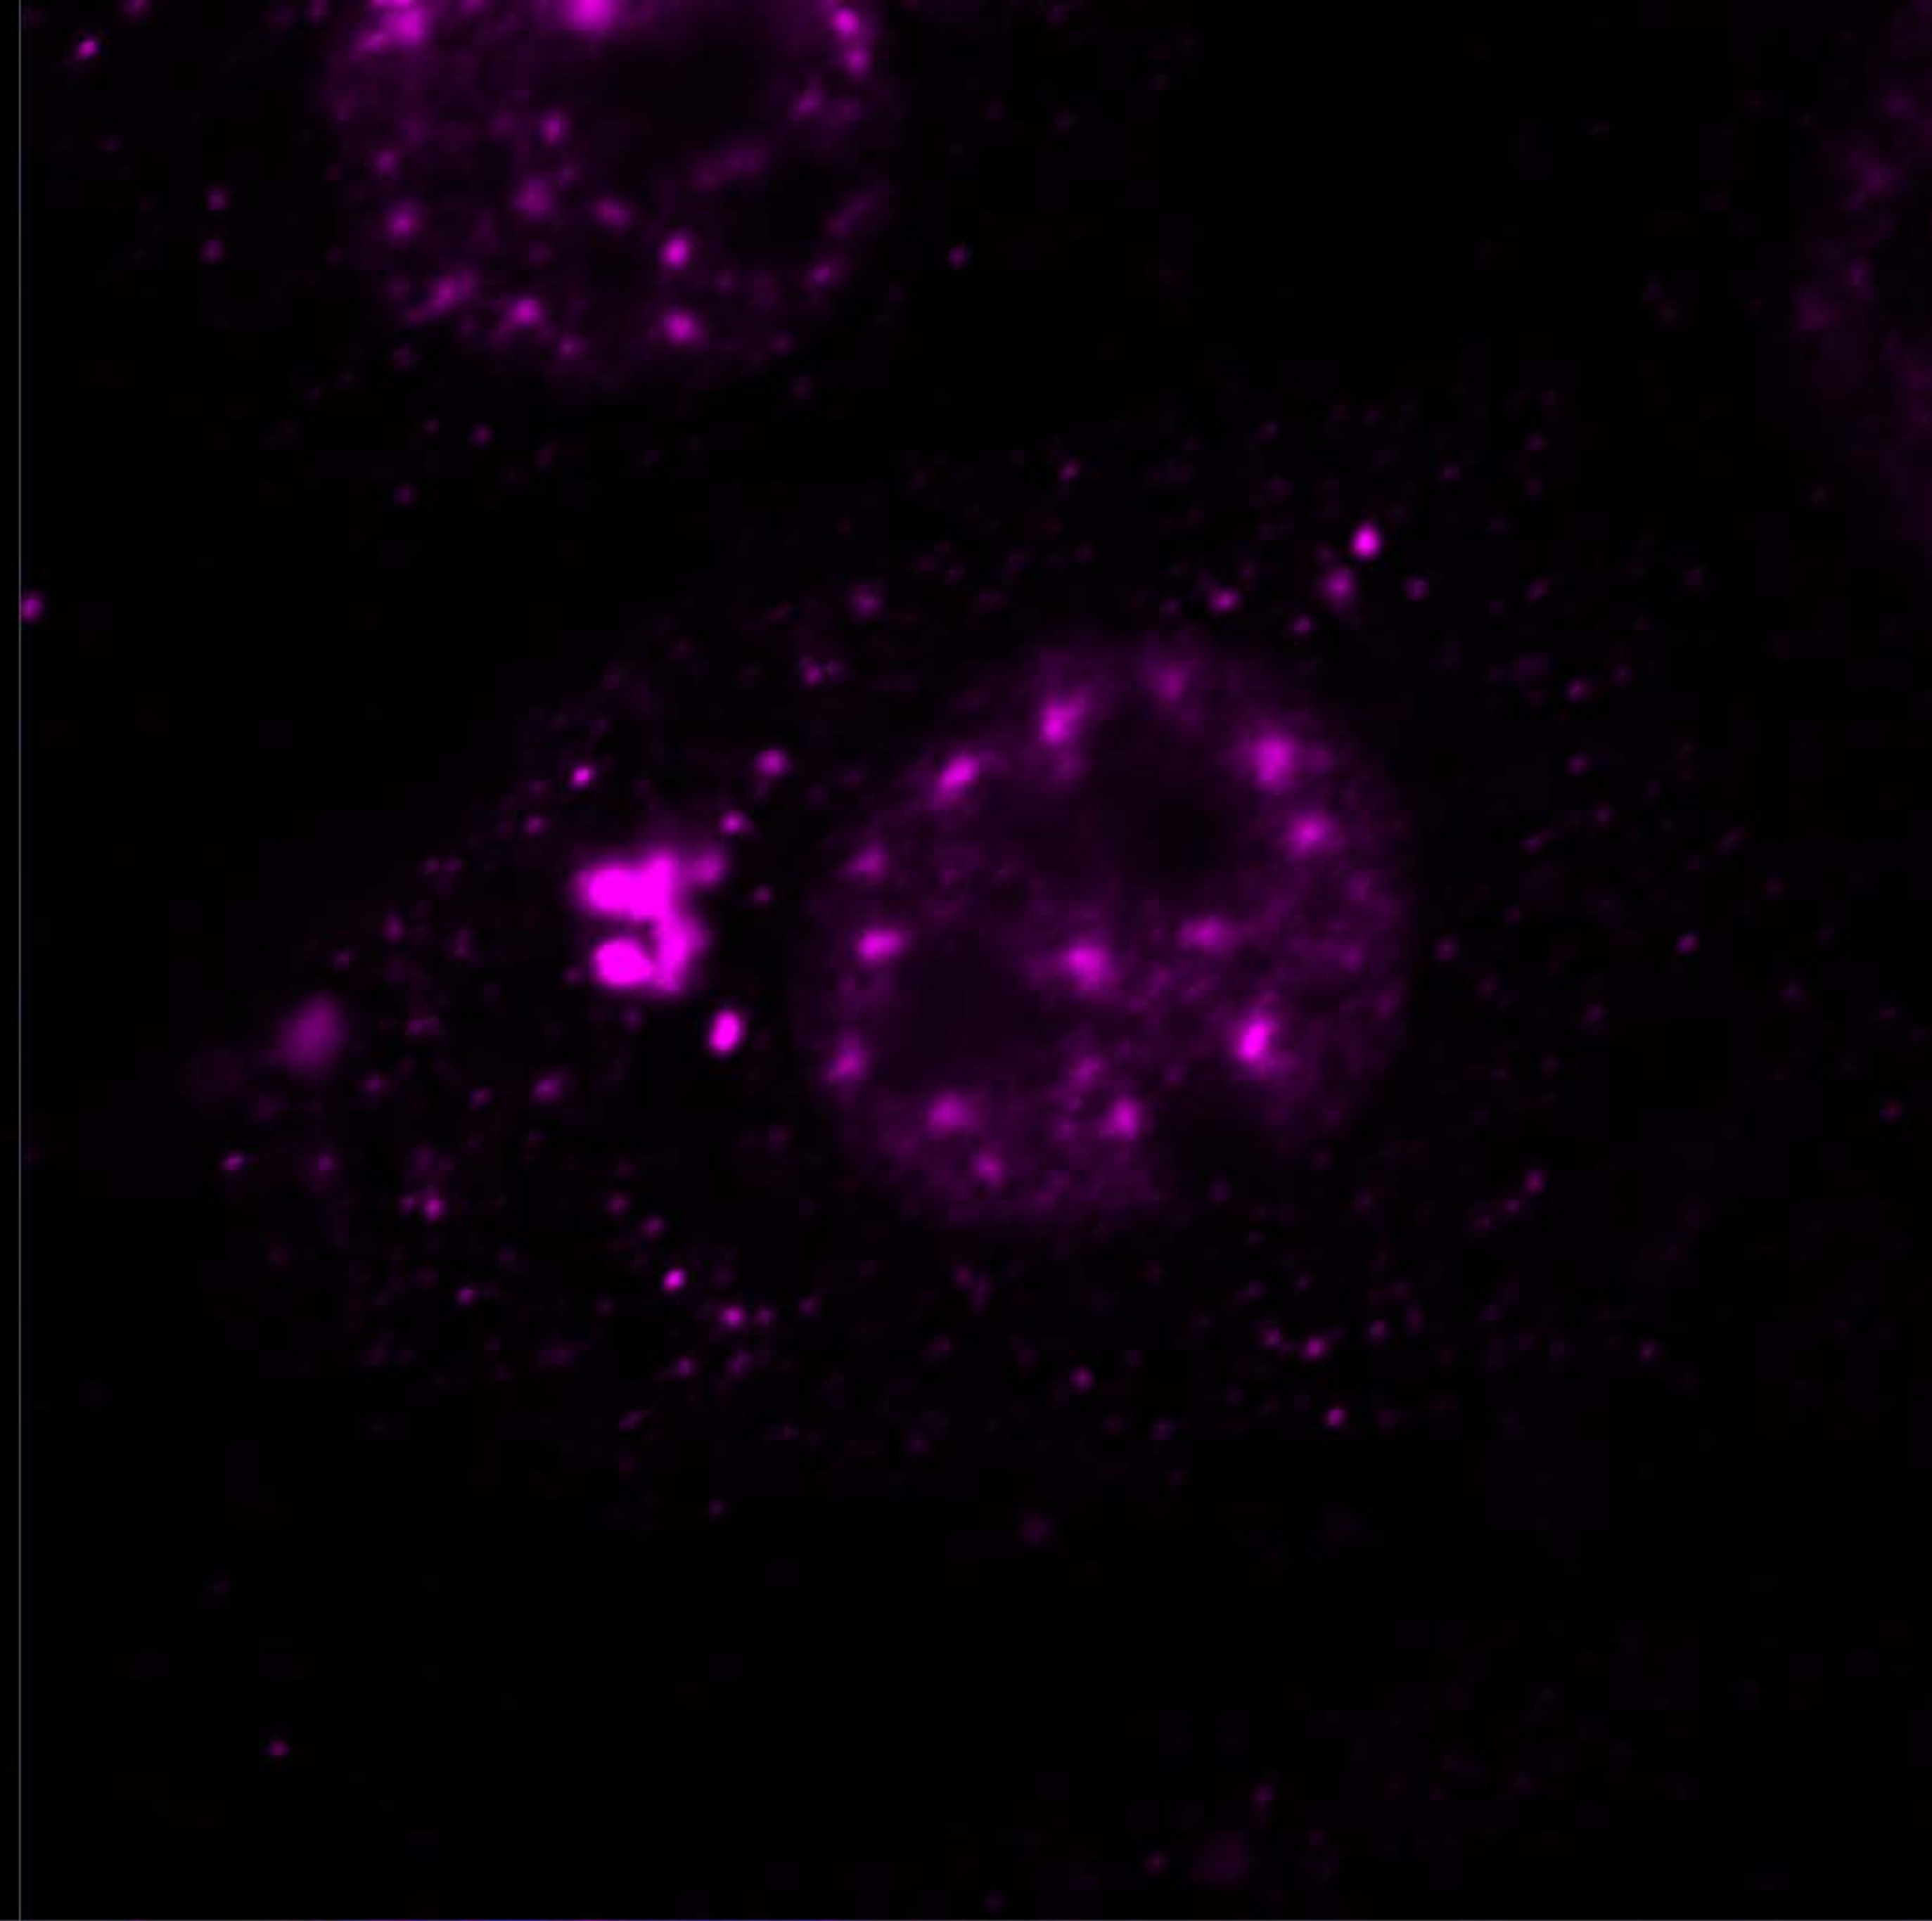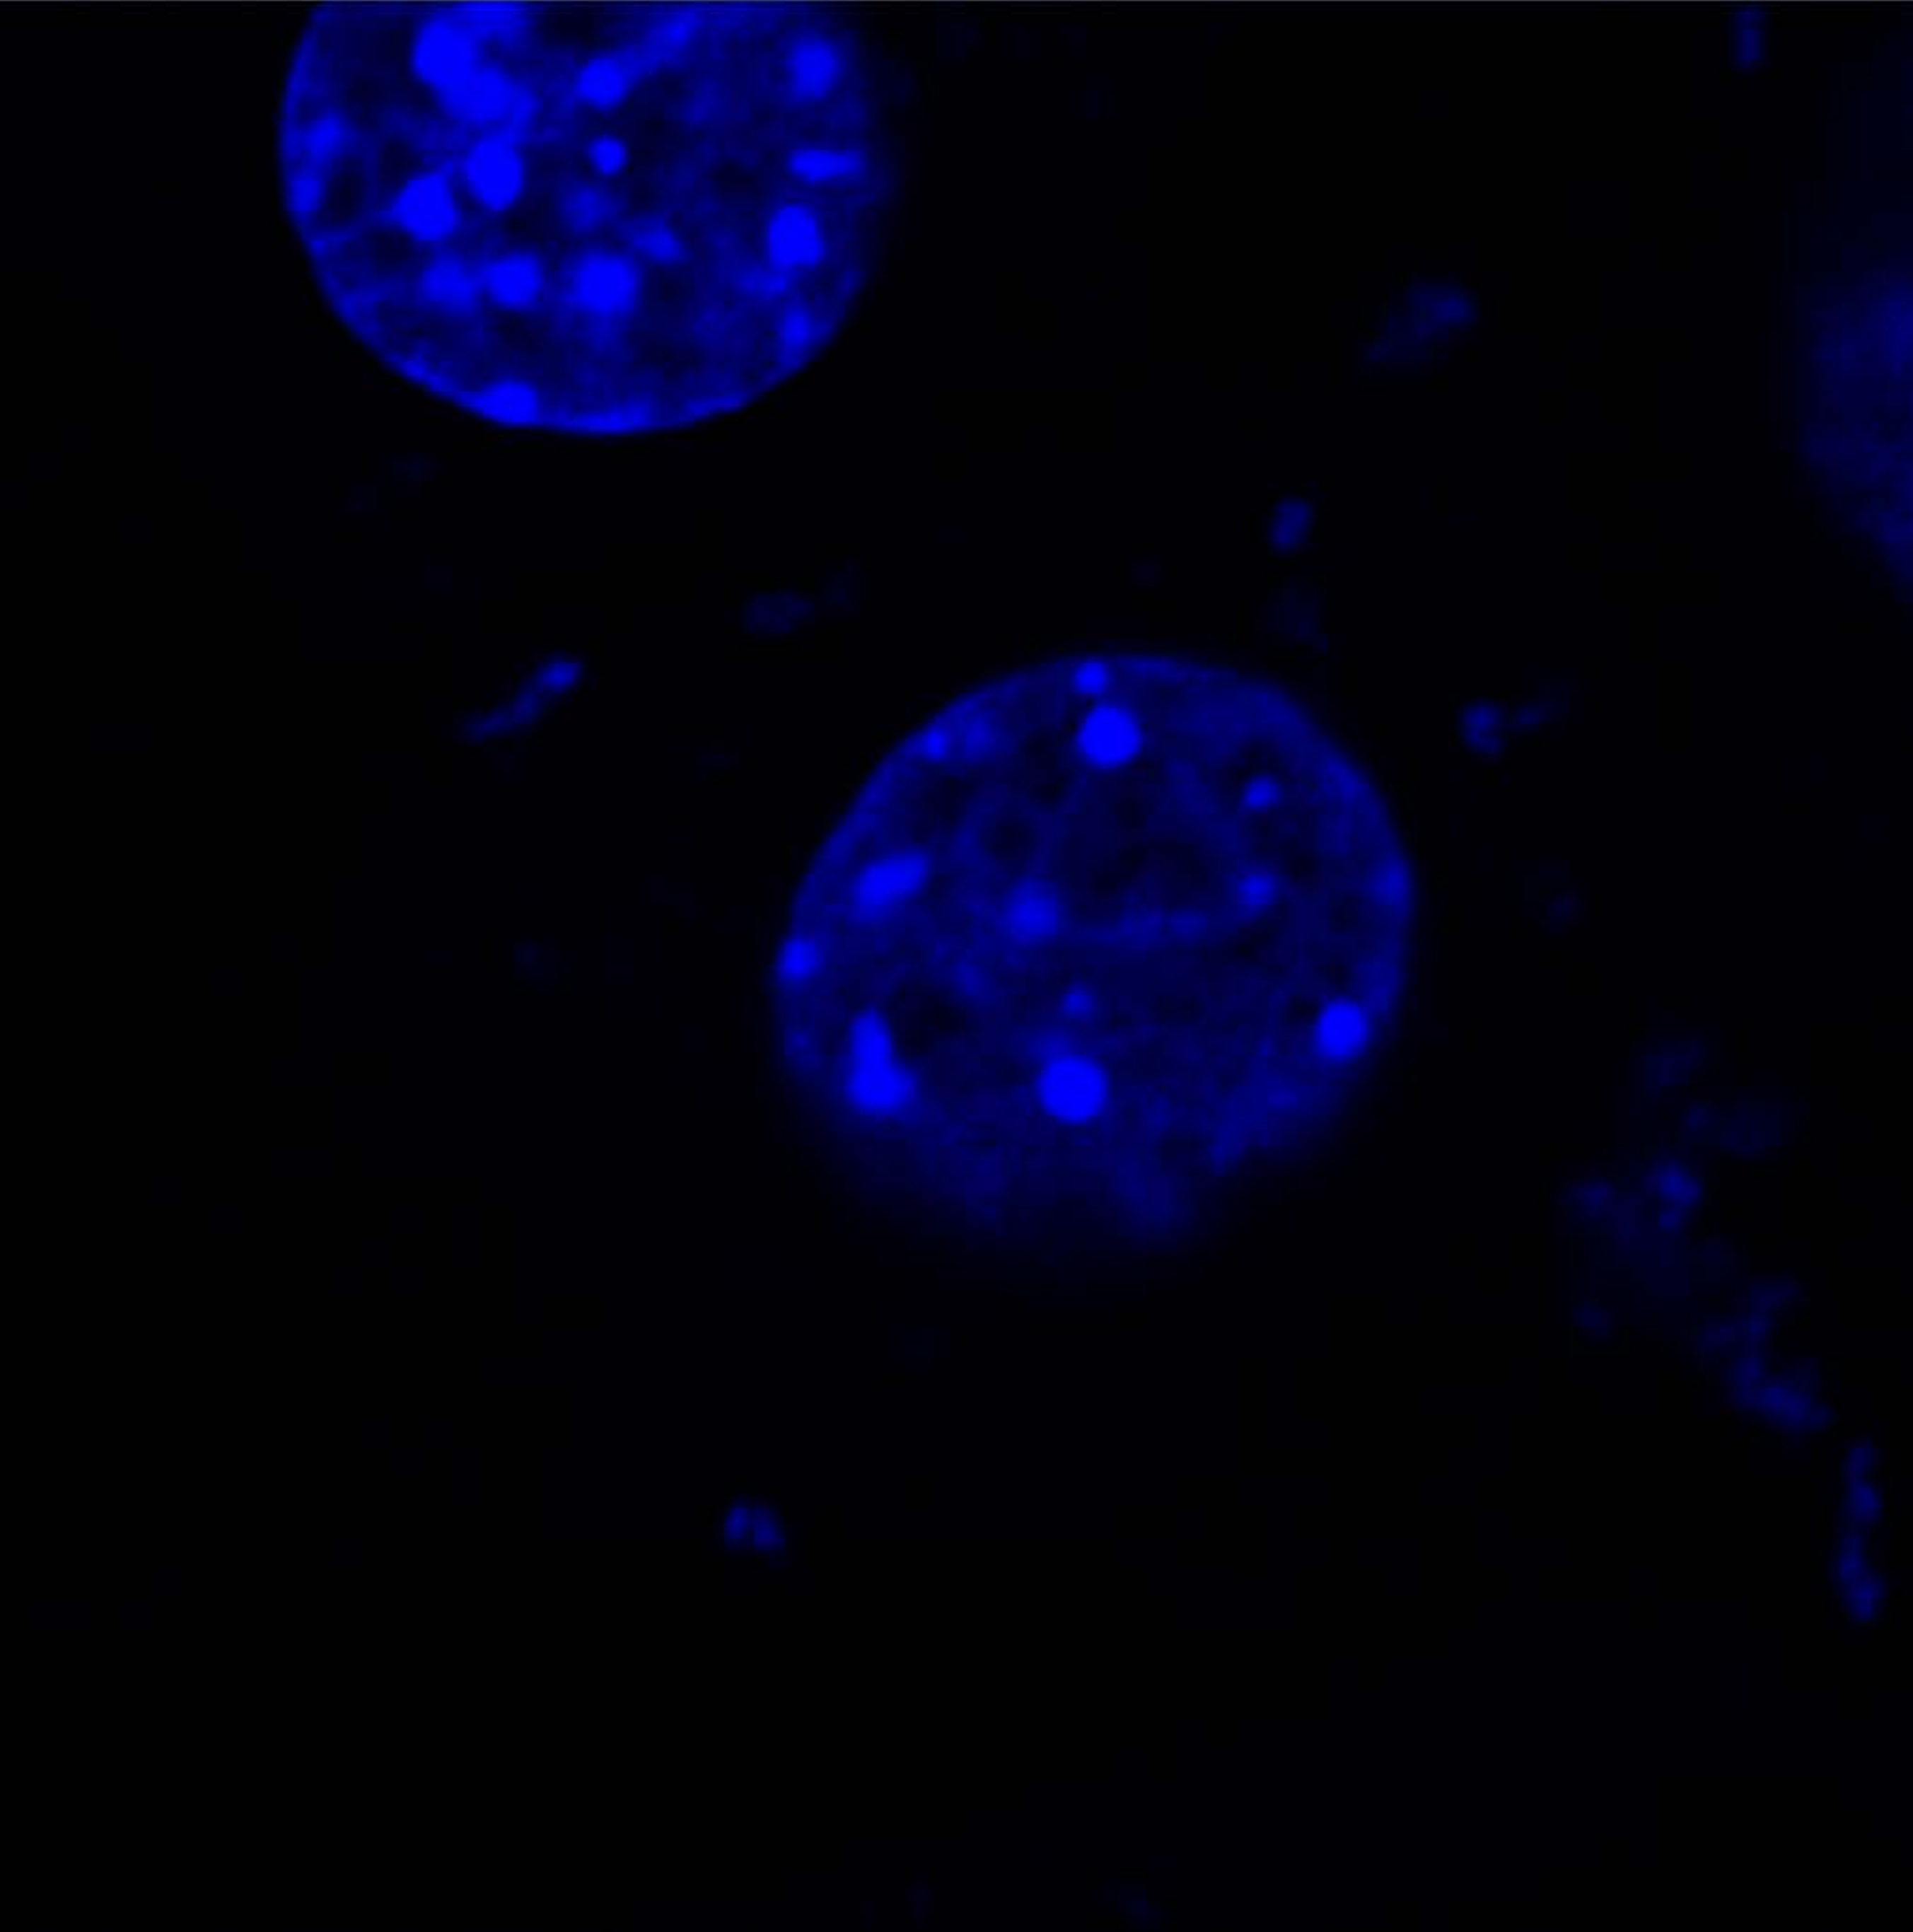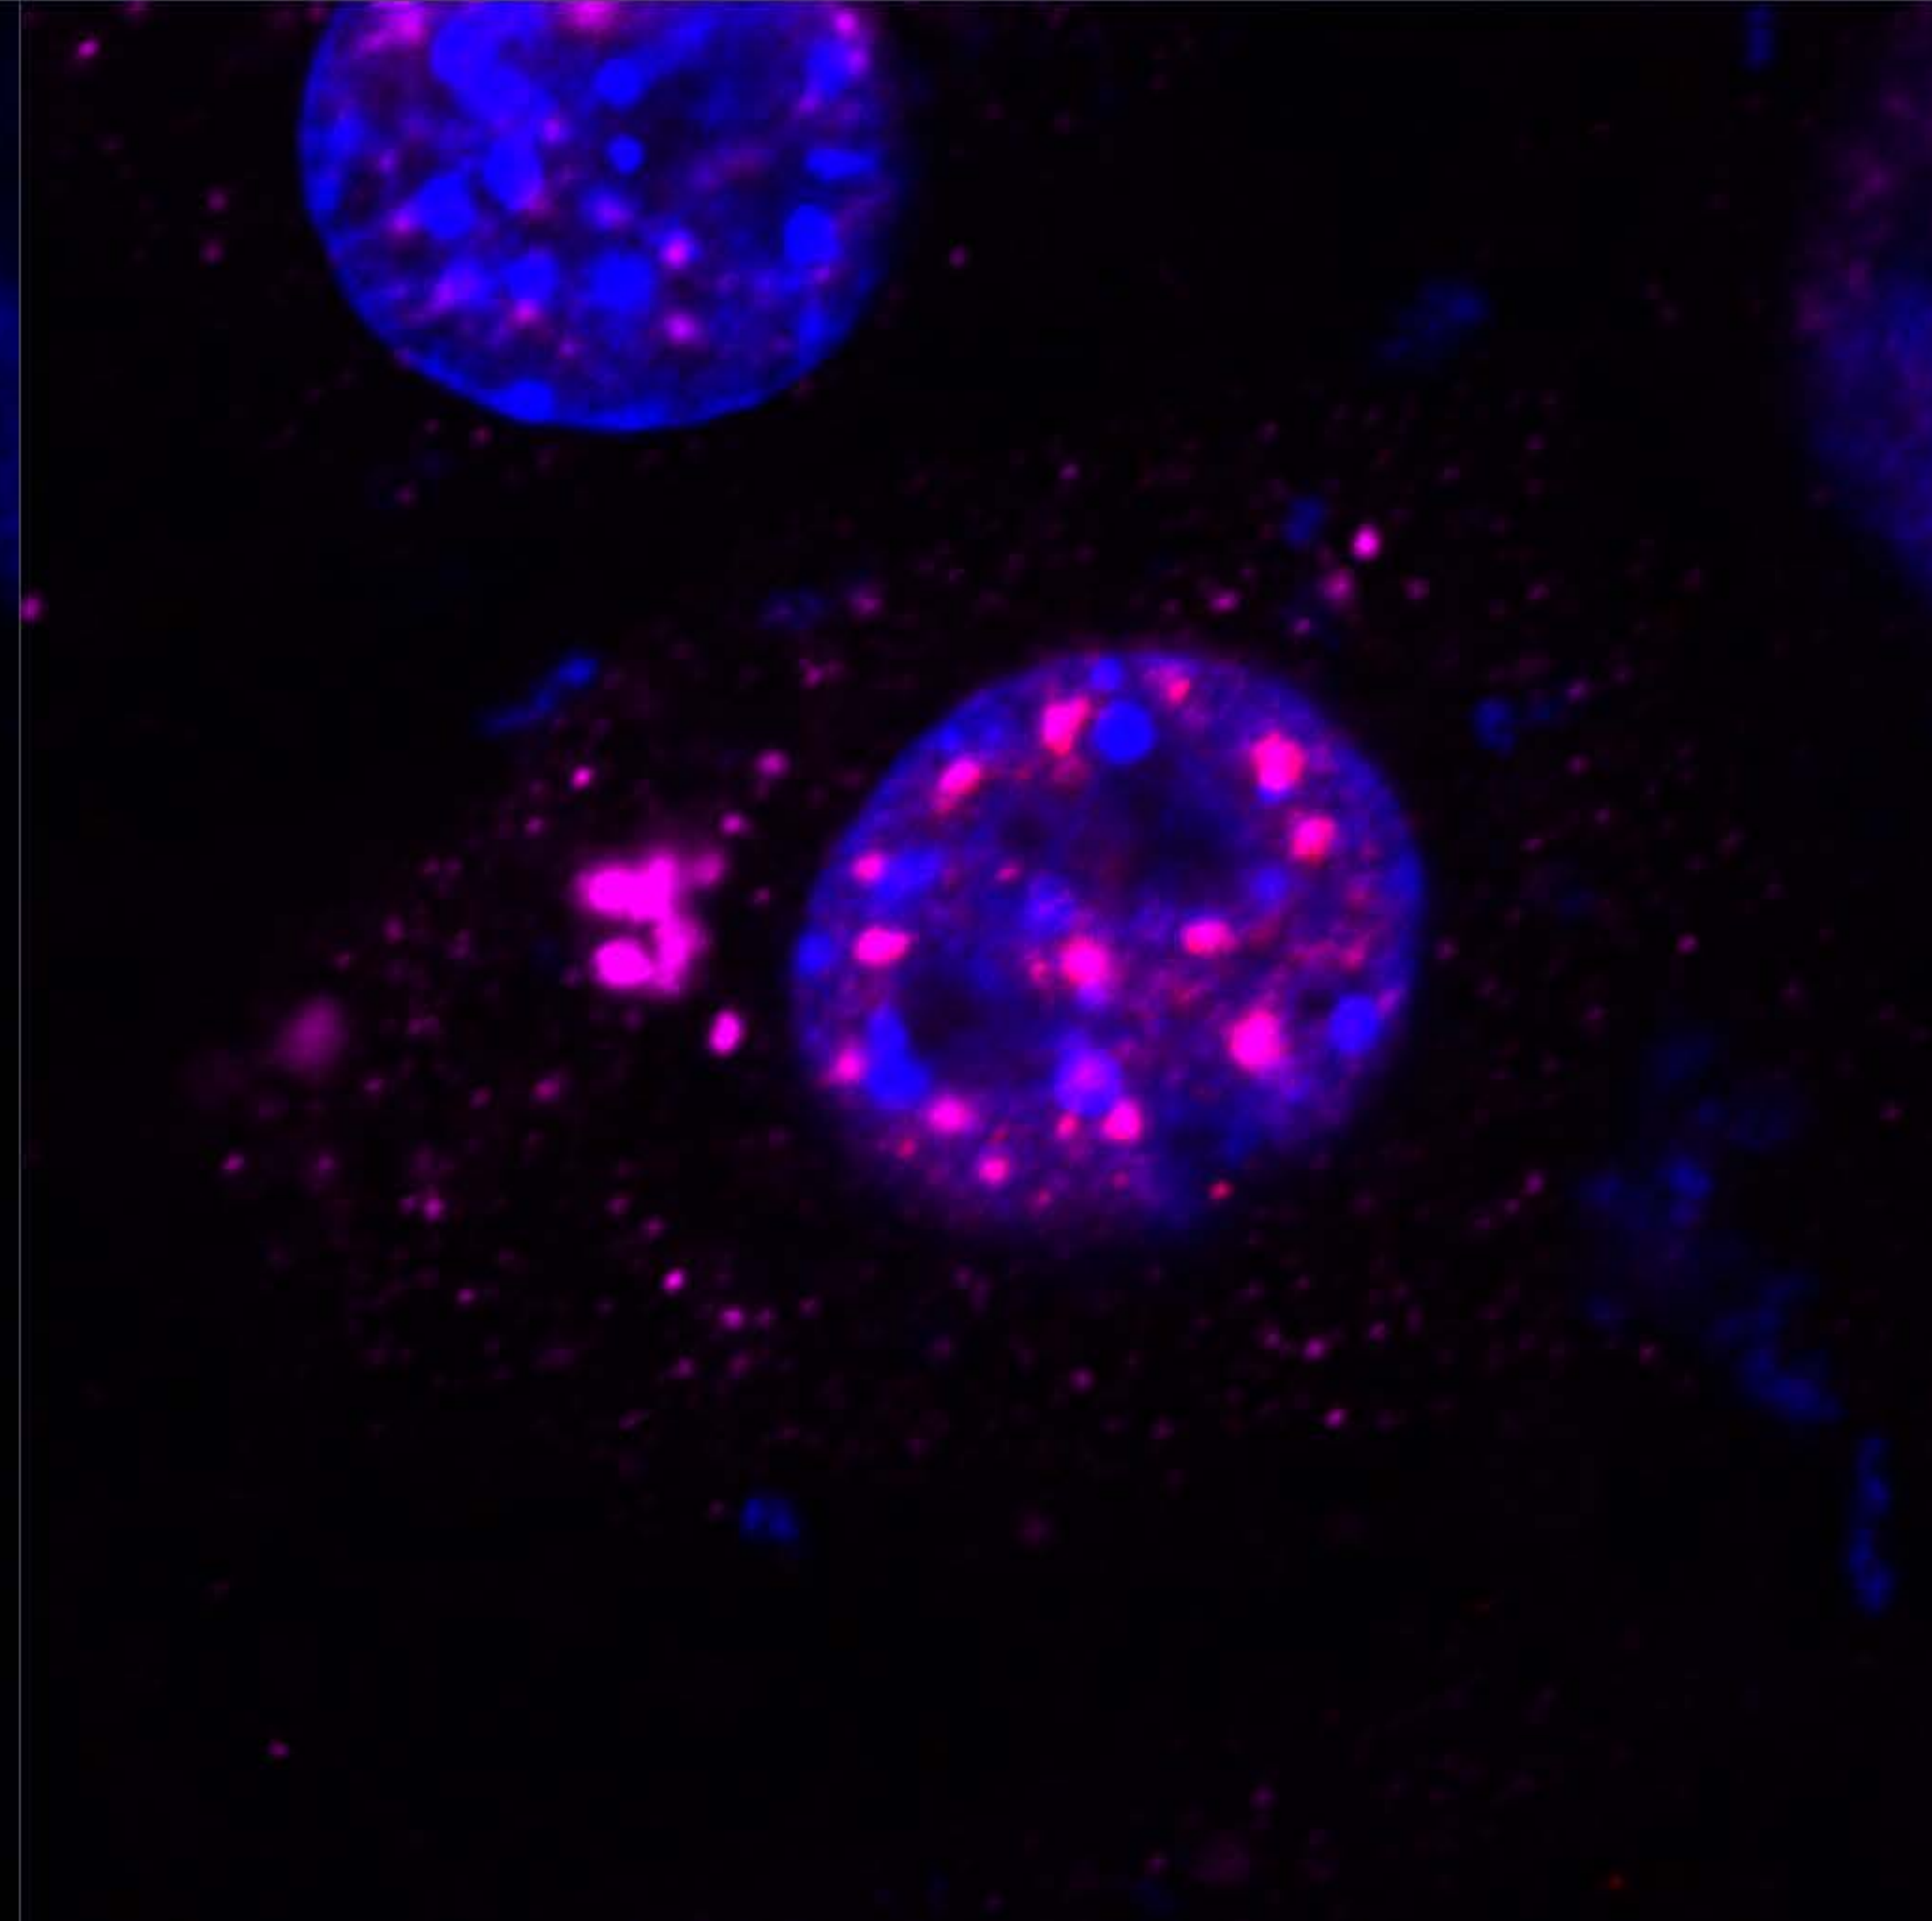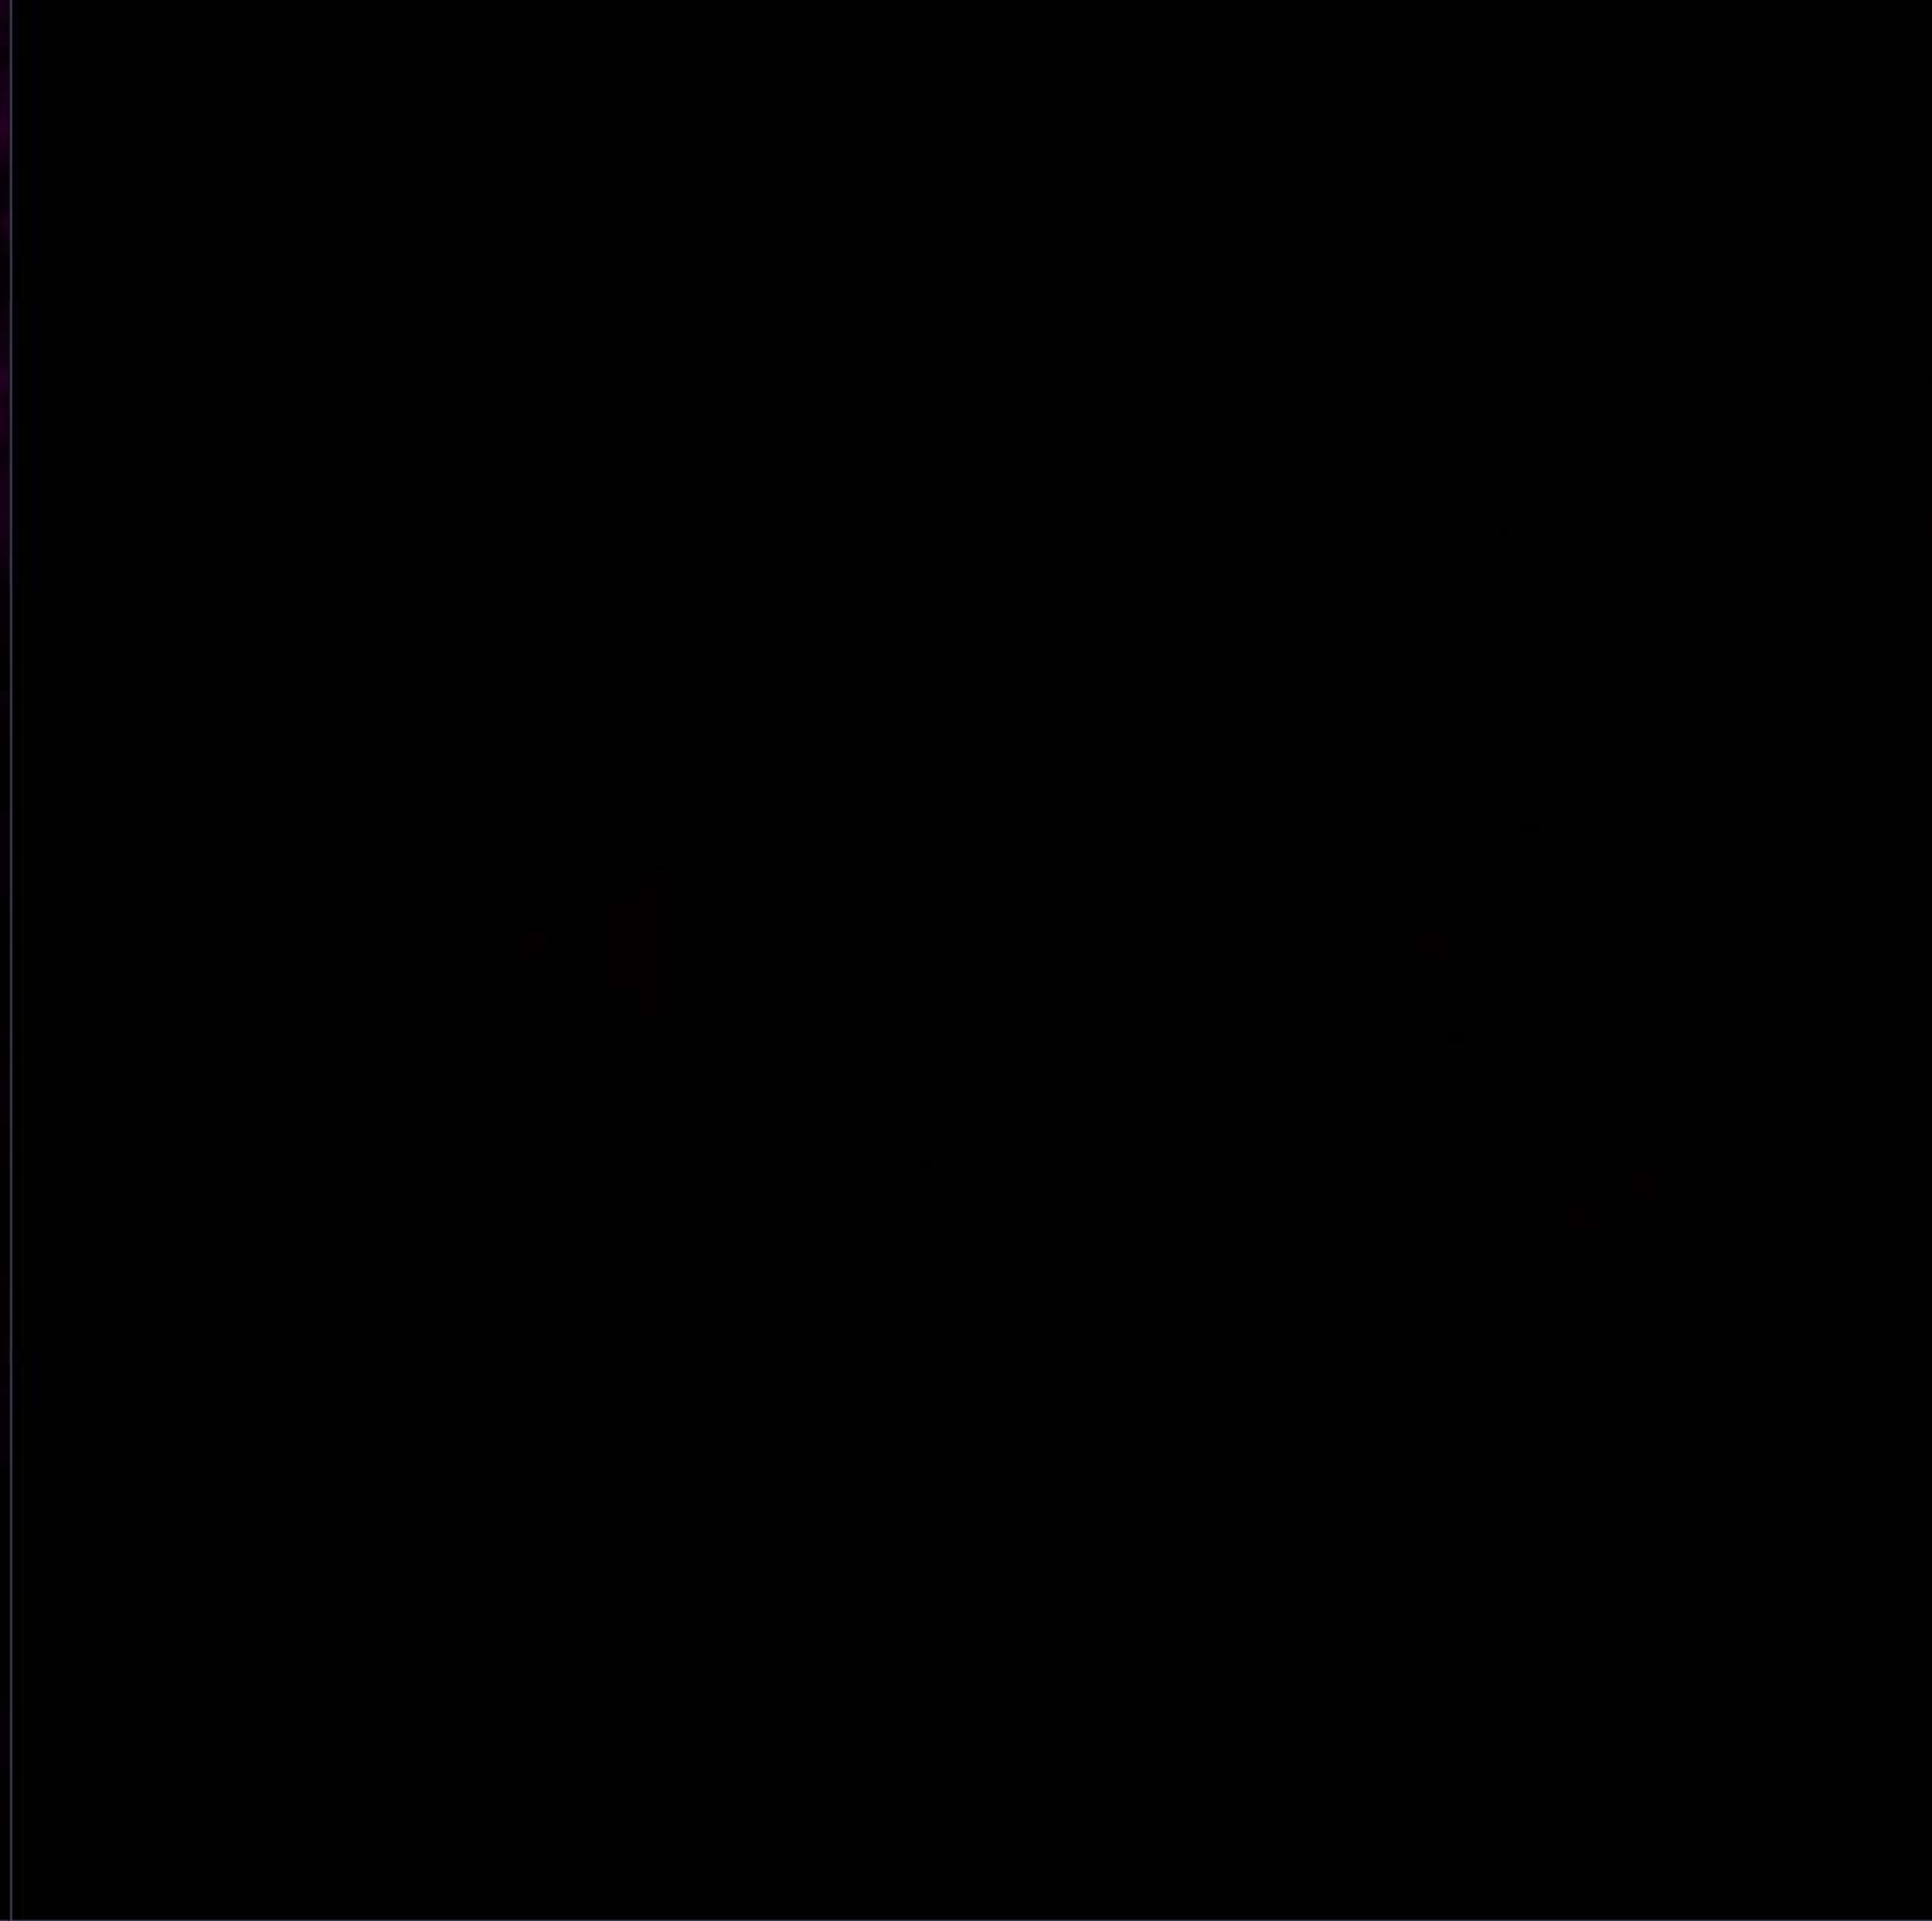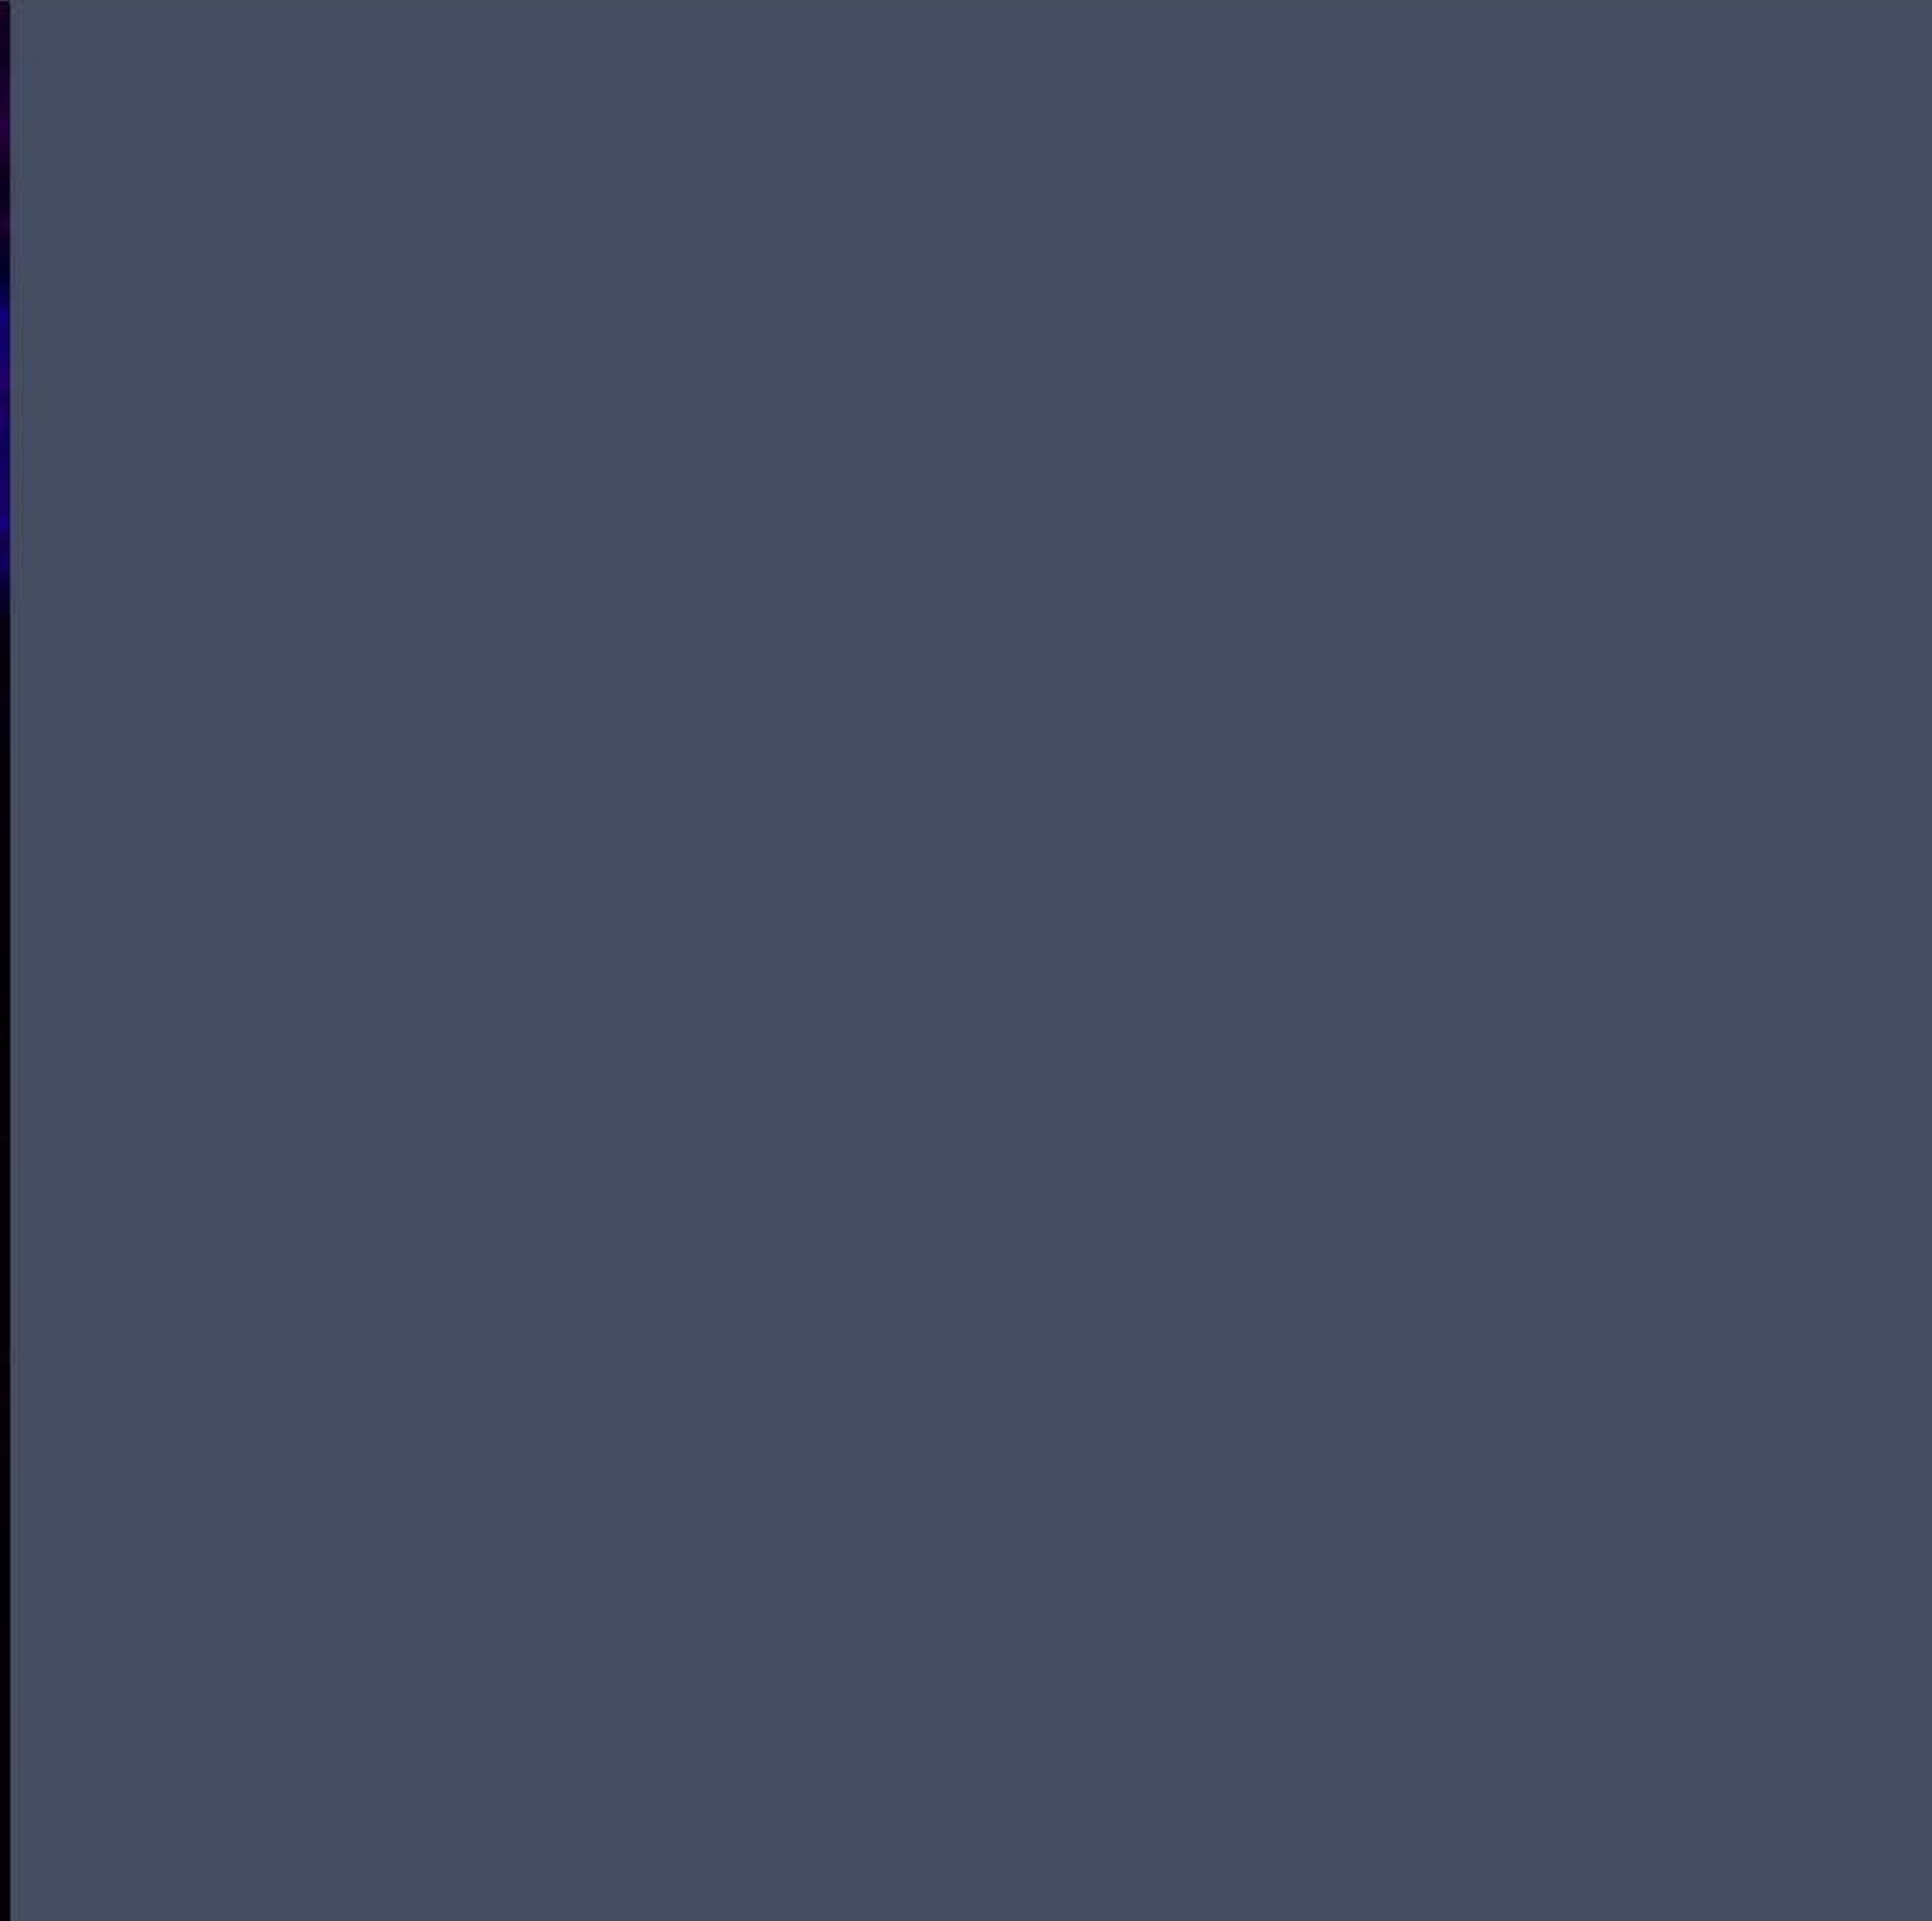

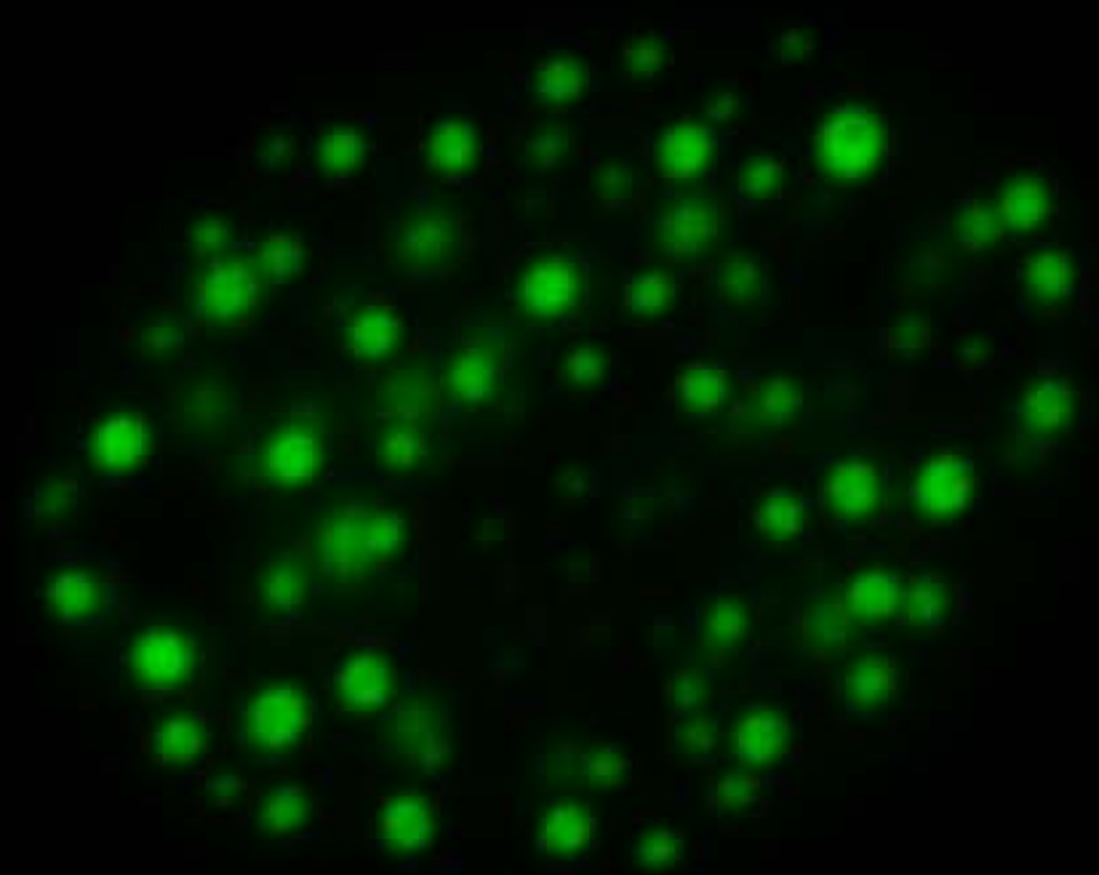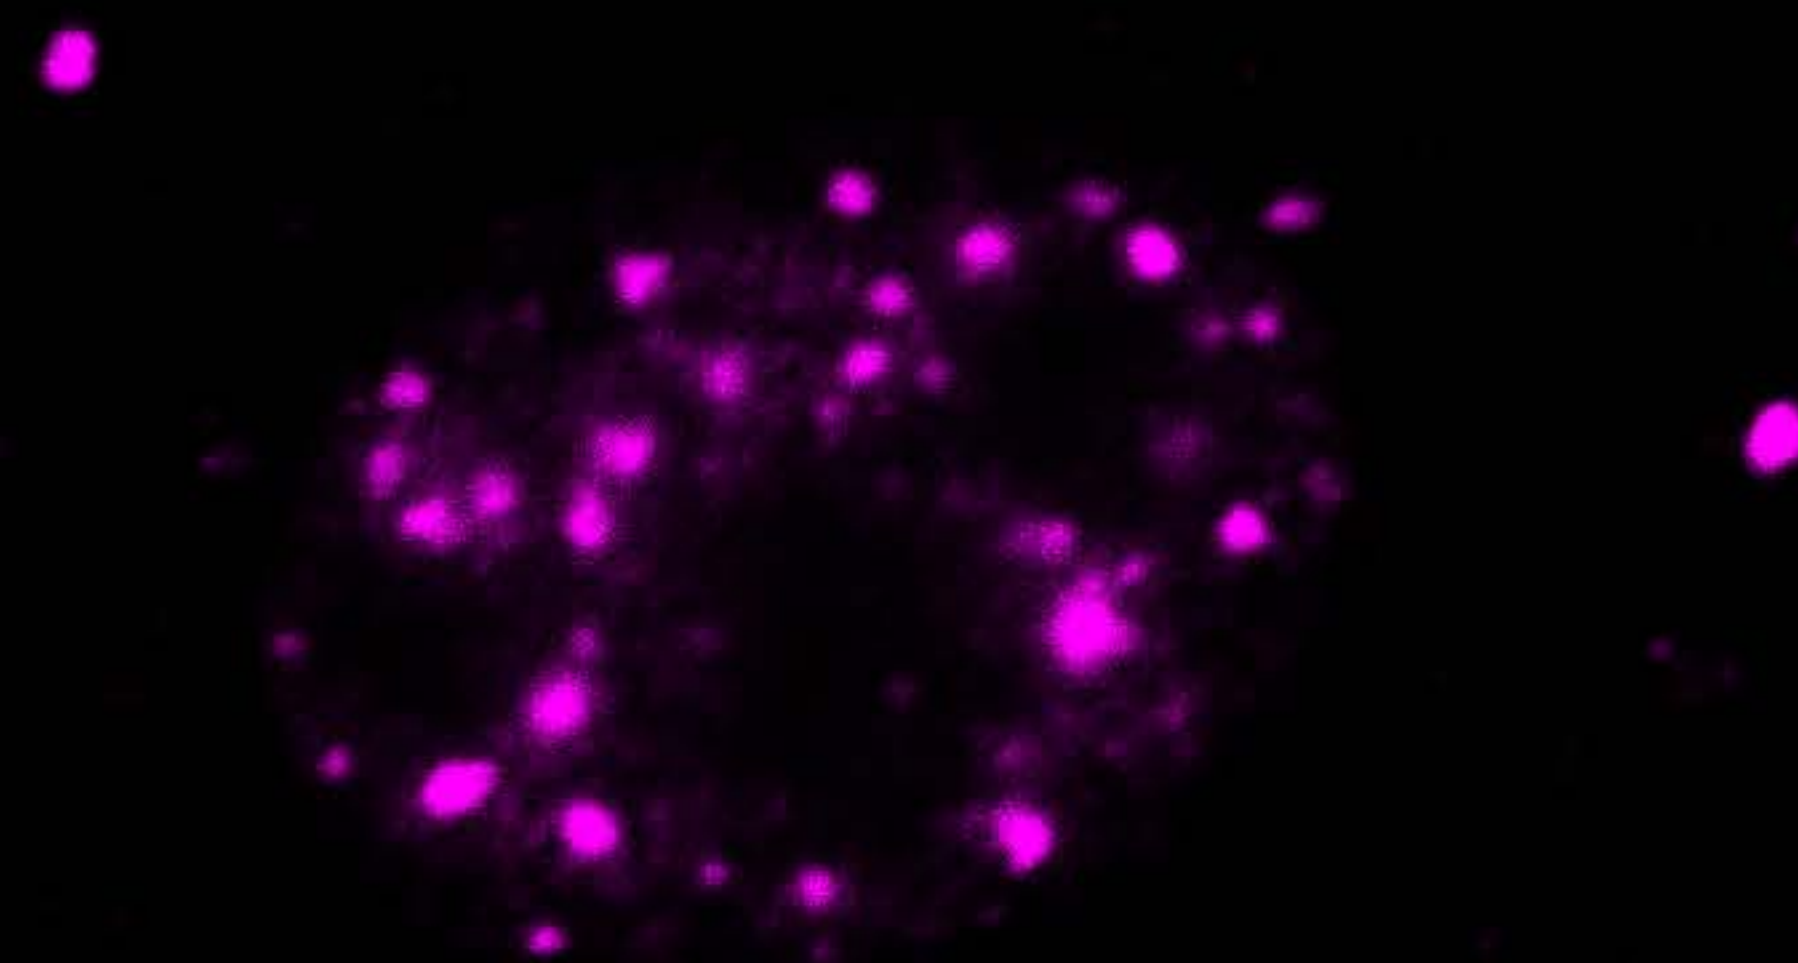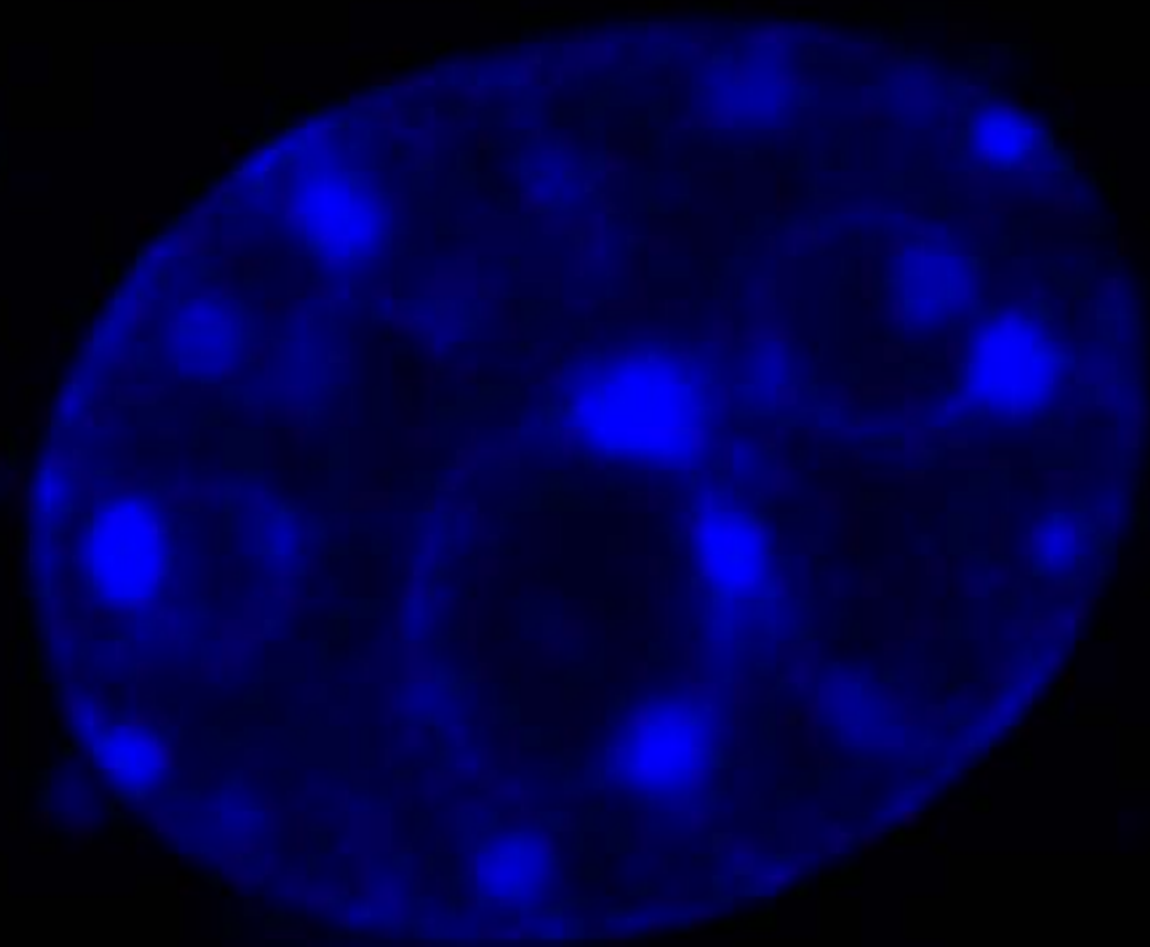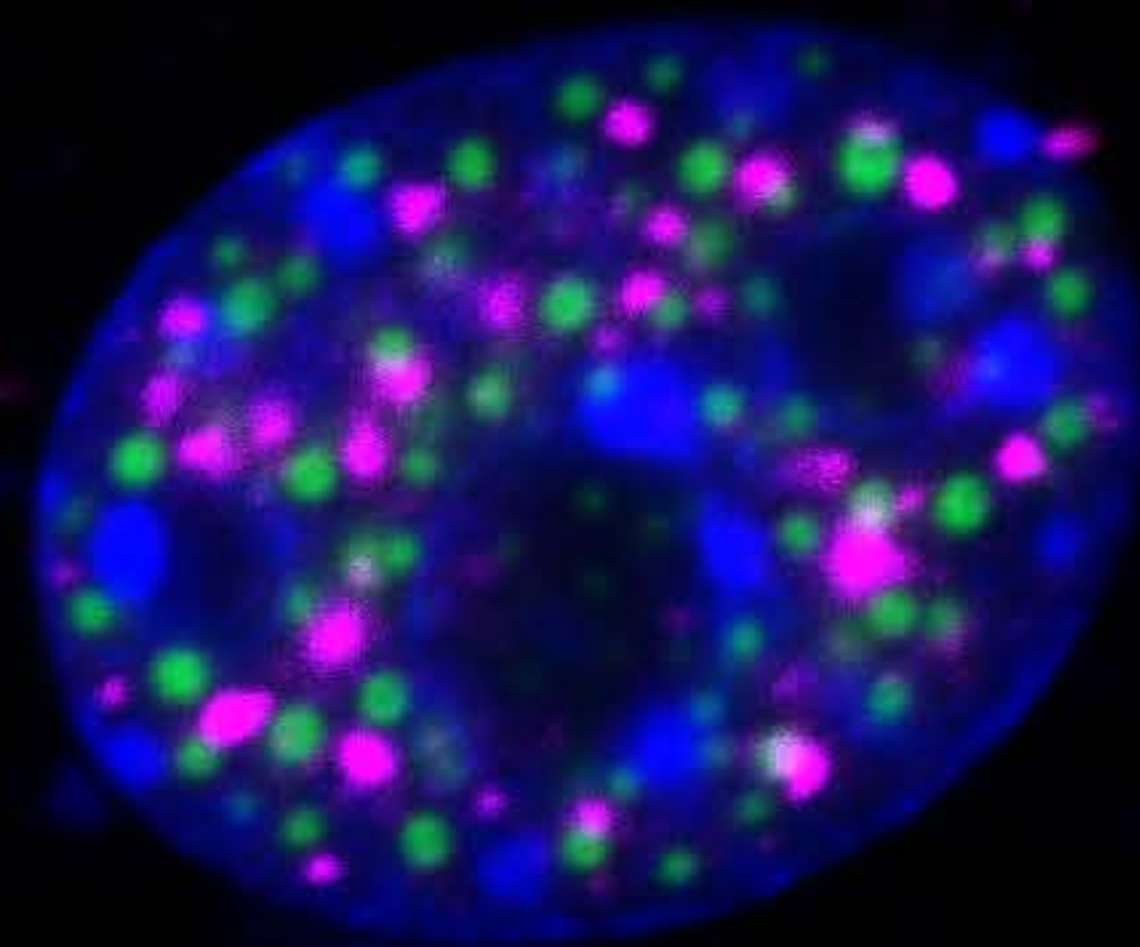

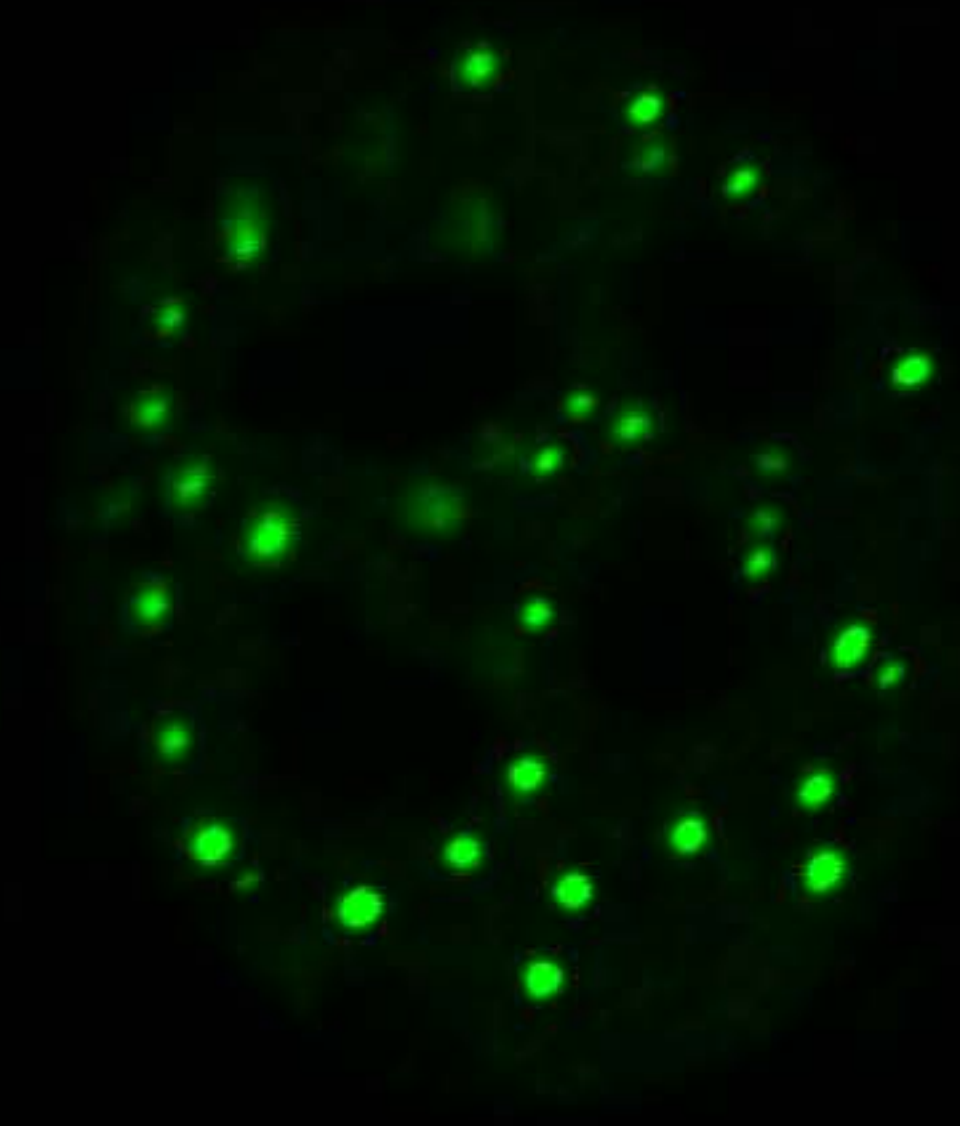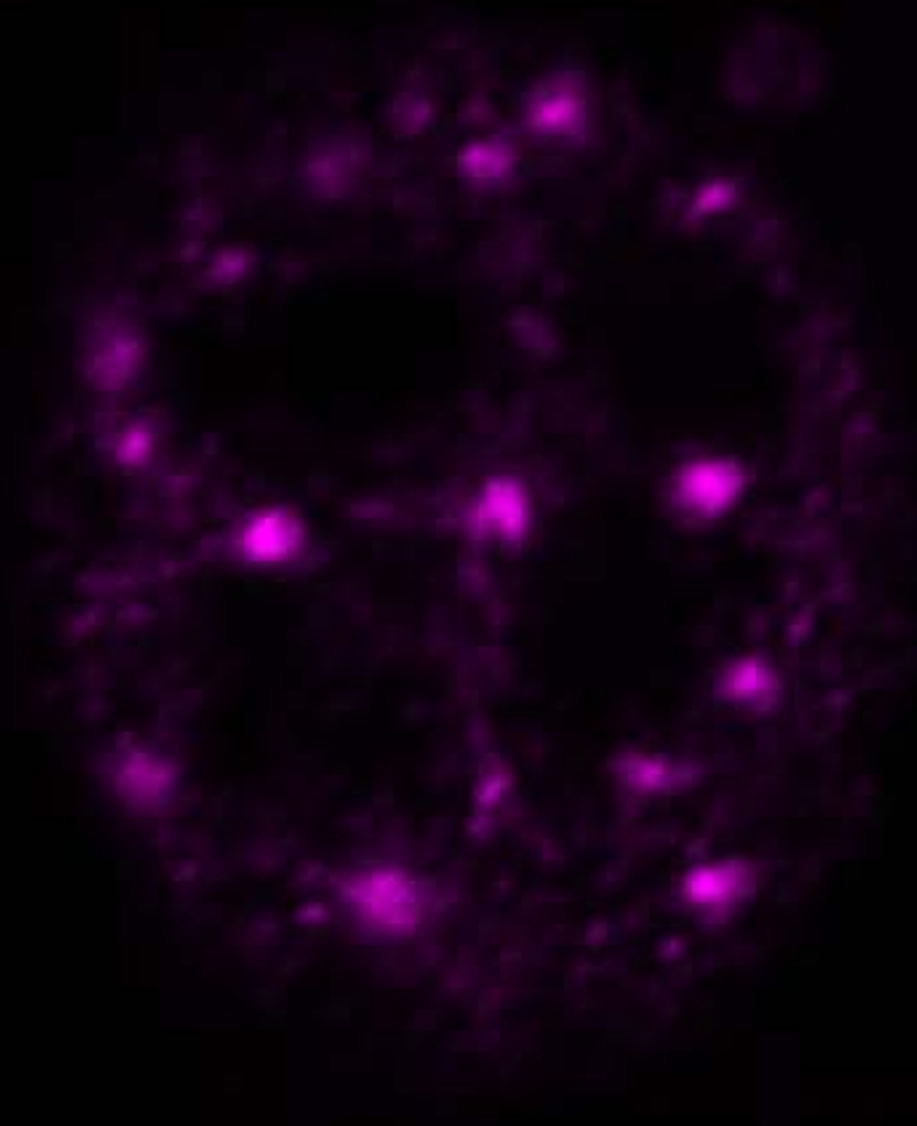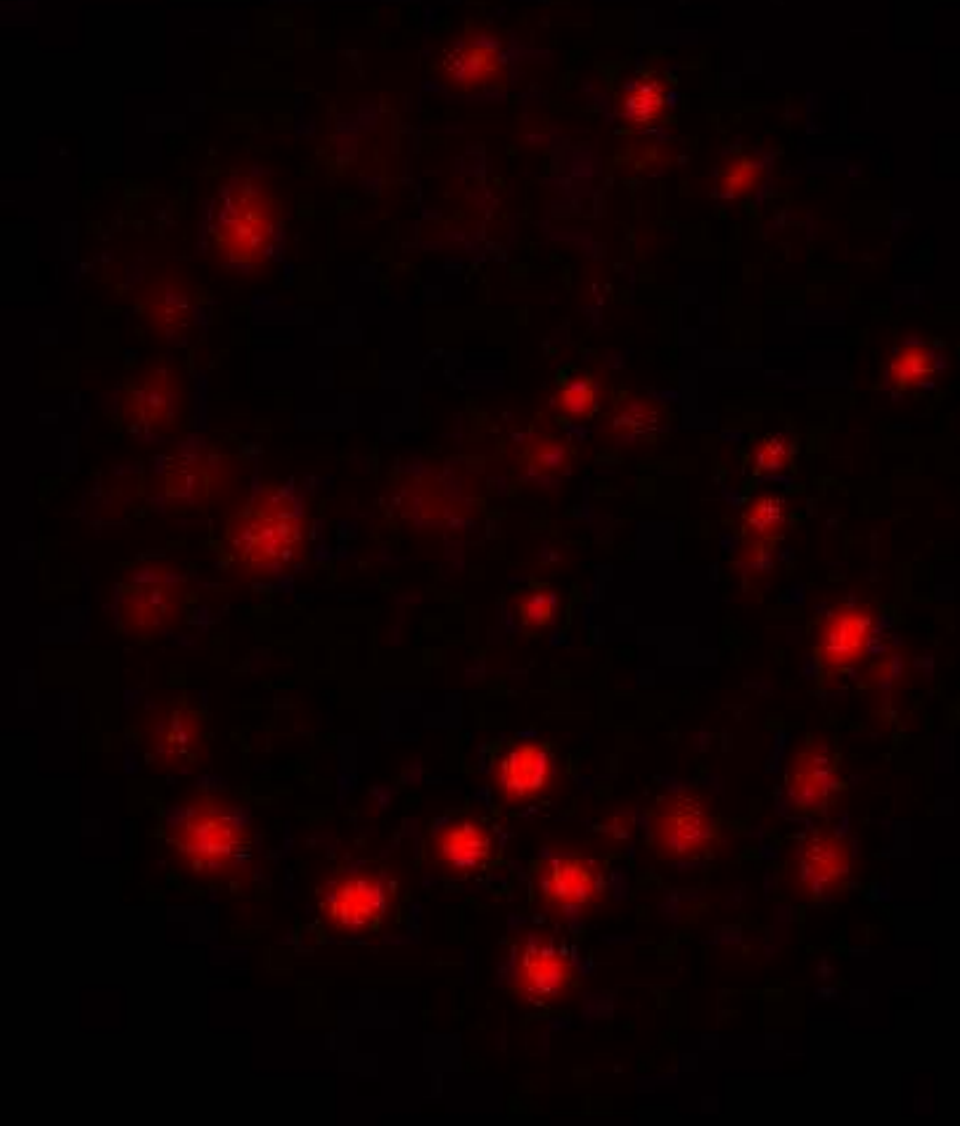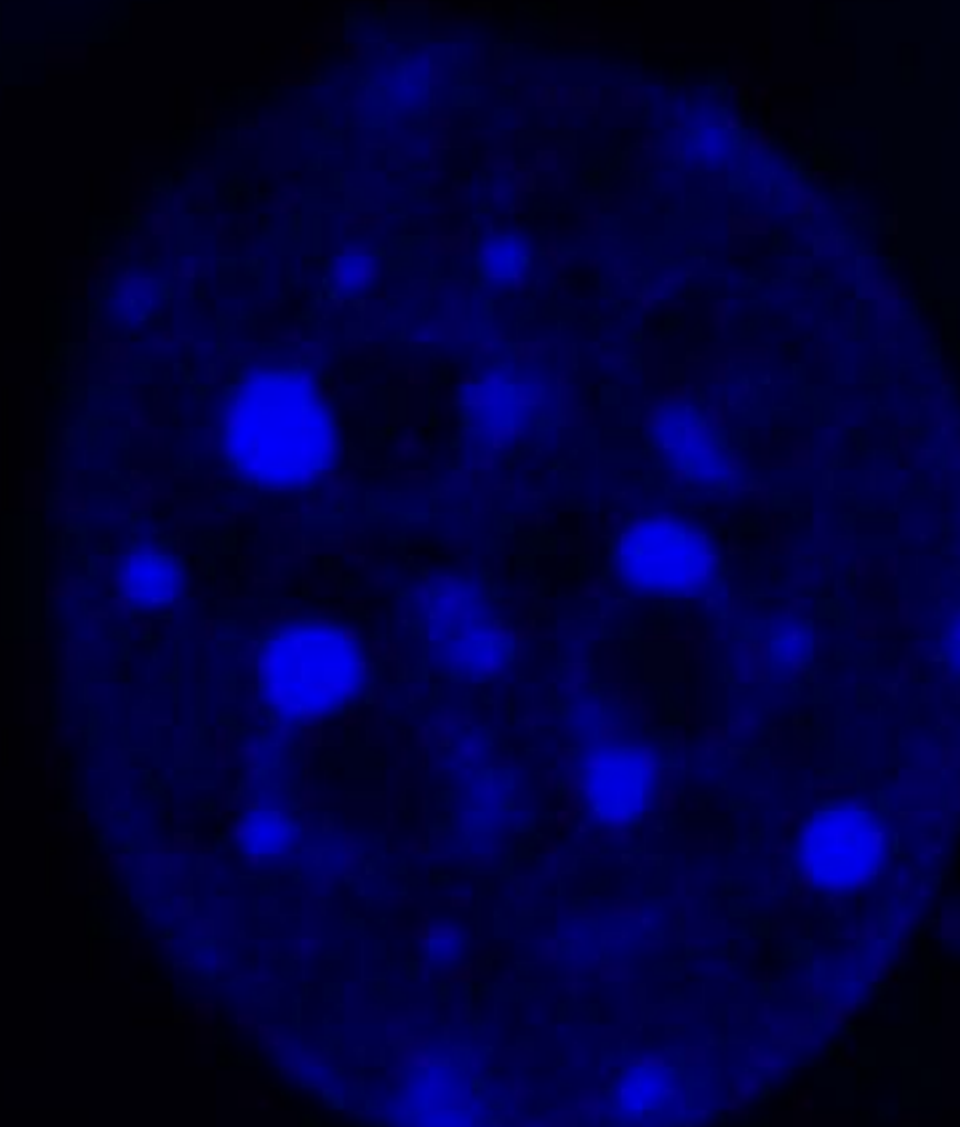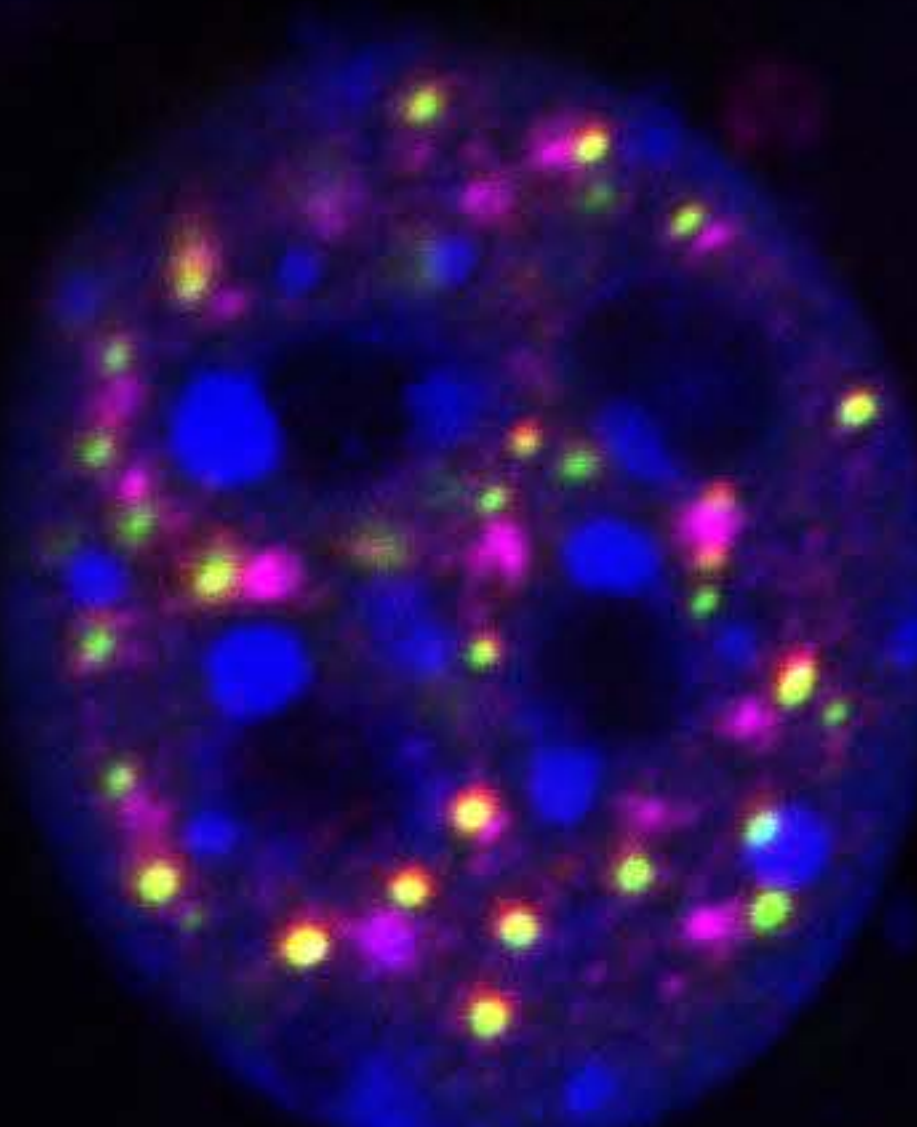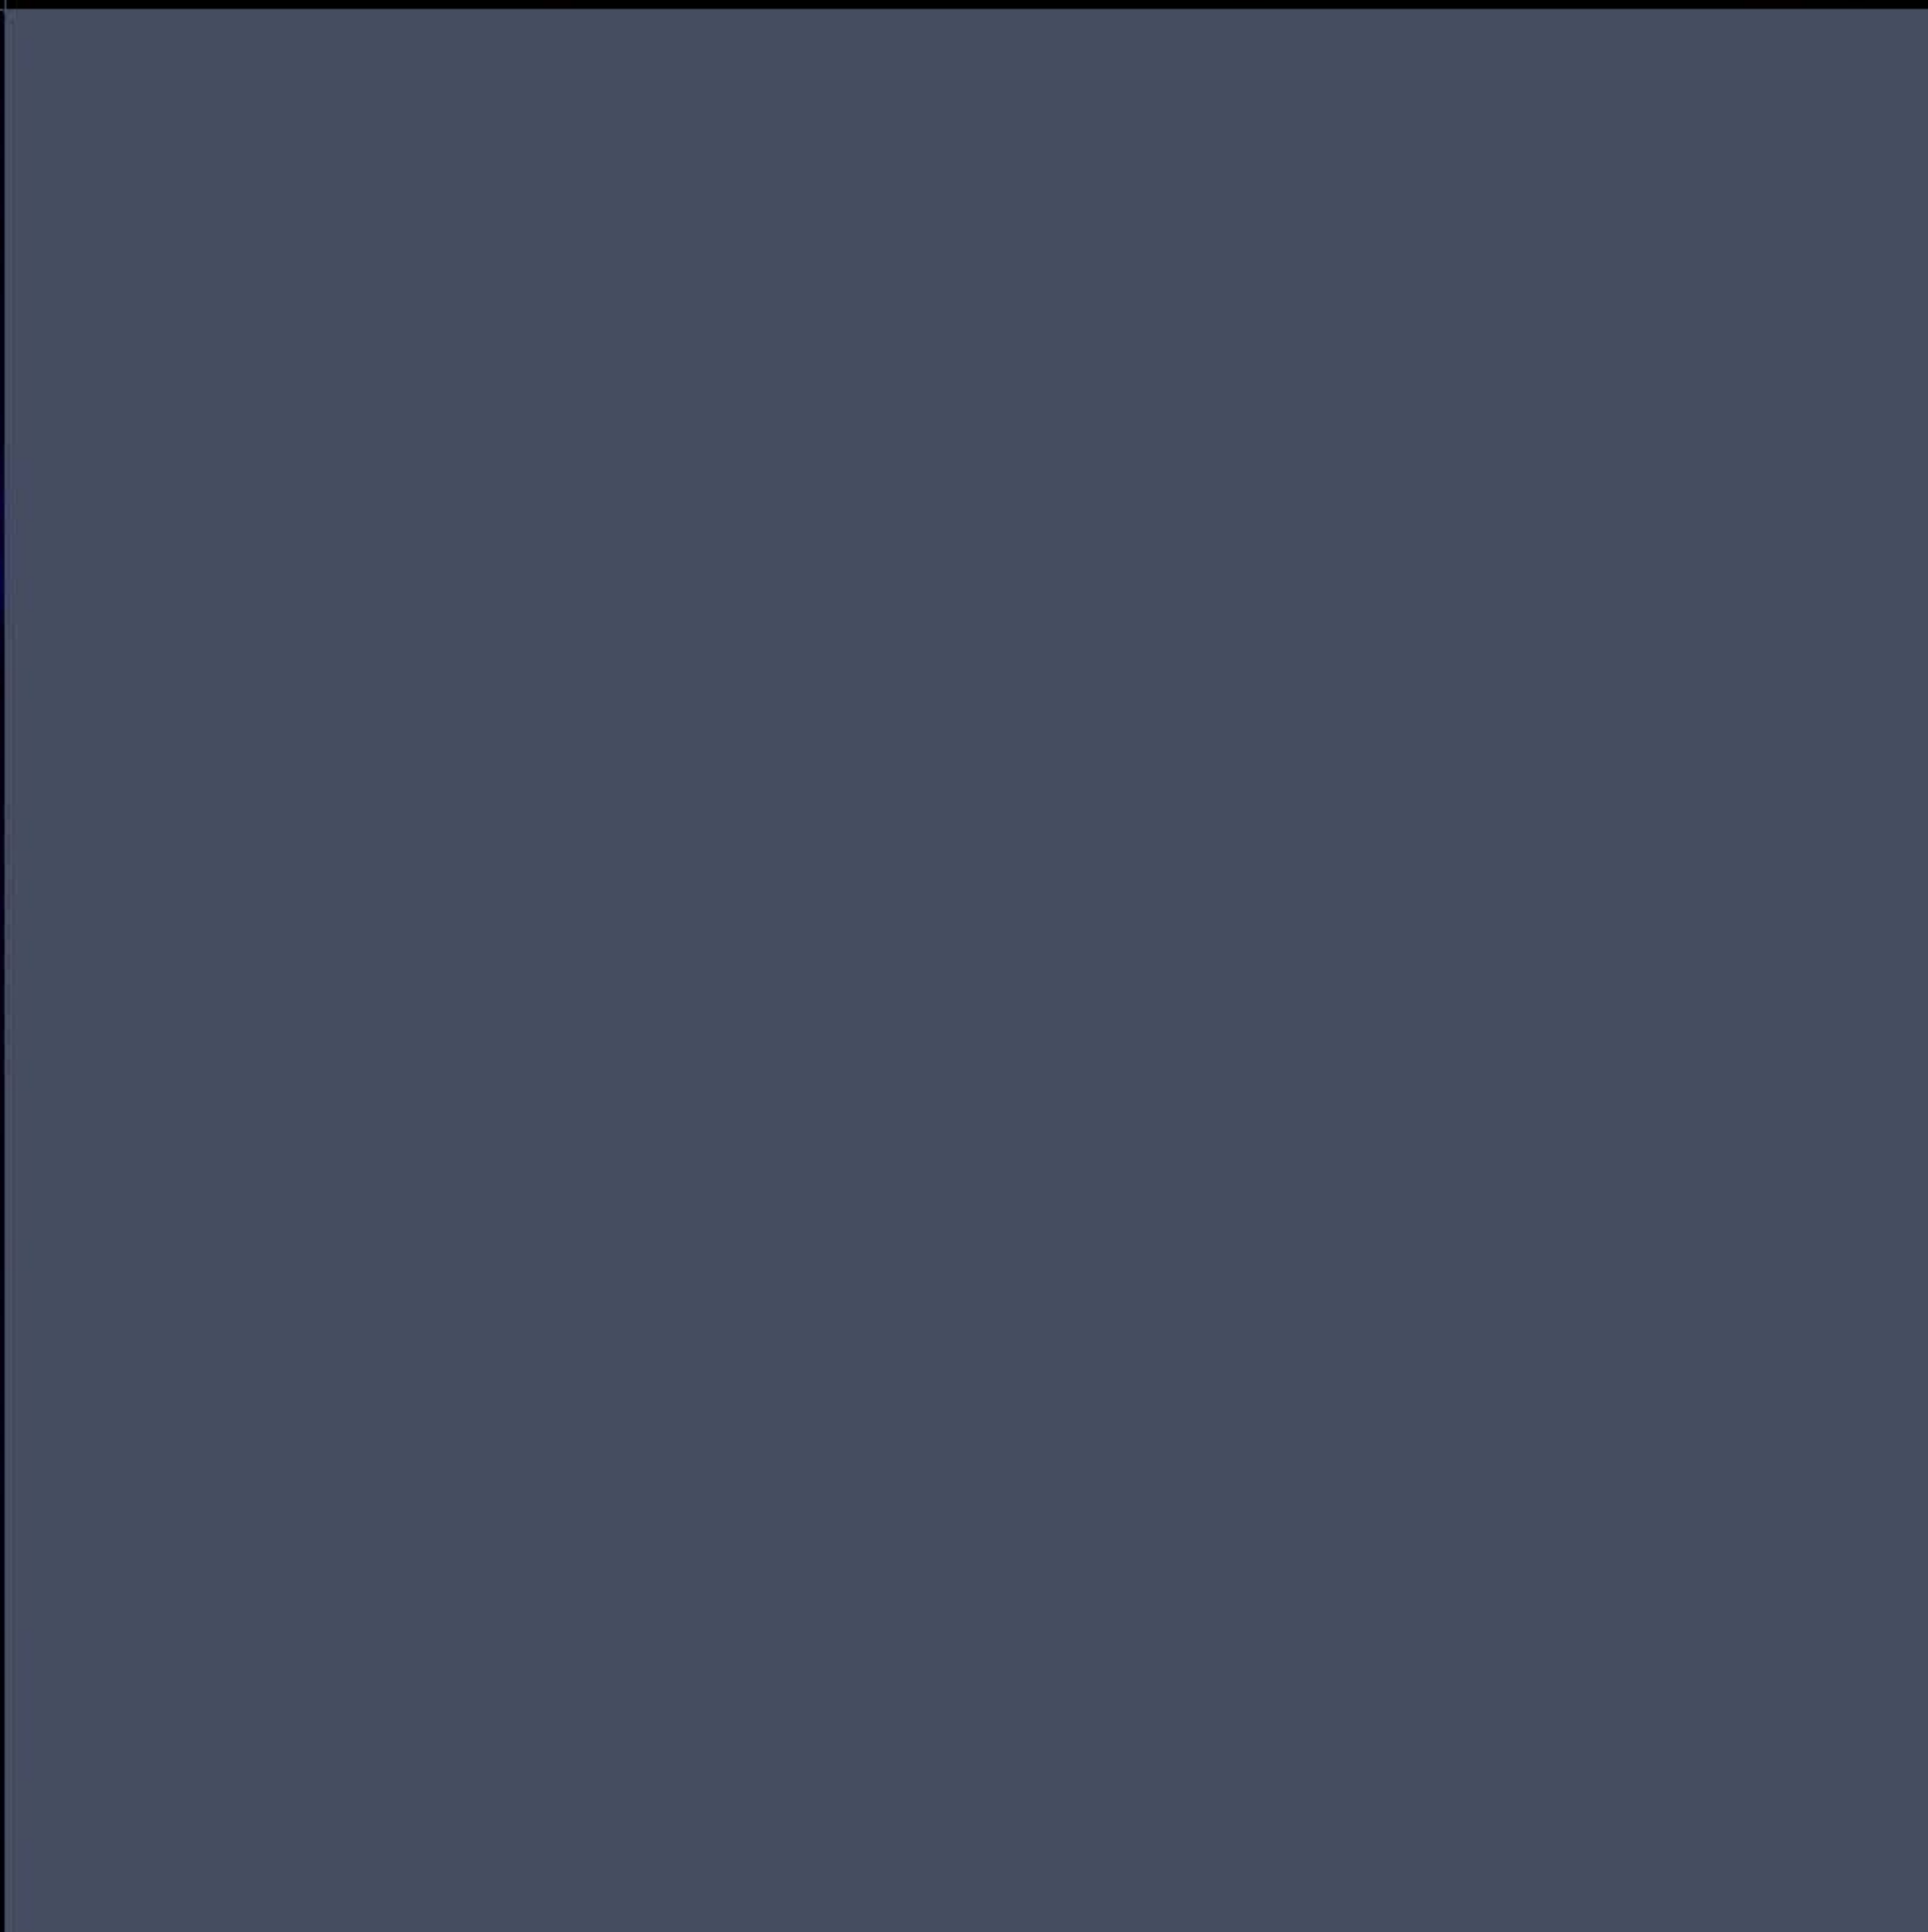

Supplement: EMBJ-35-1254-s005.pdf [file EMBJ-35-1254-s005.pdf]

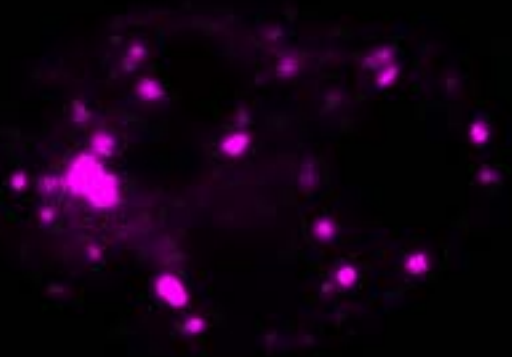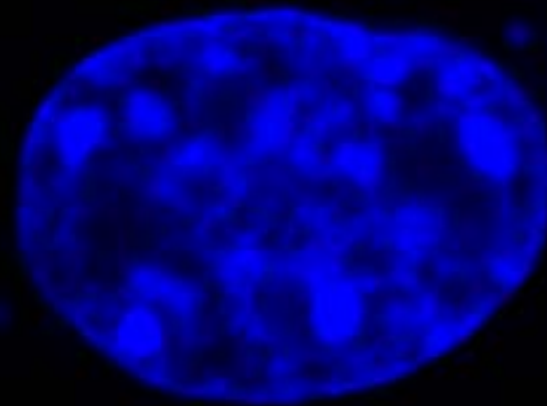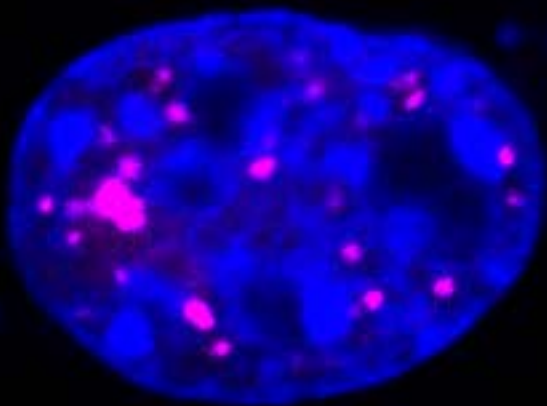

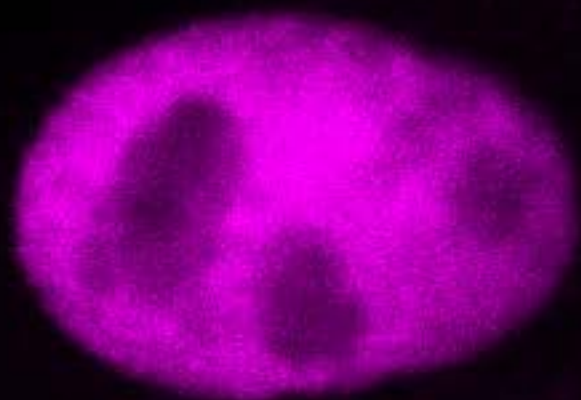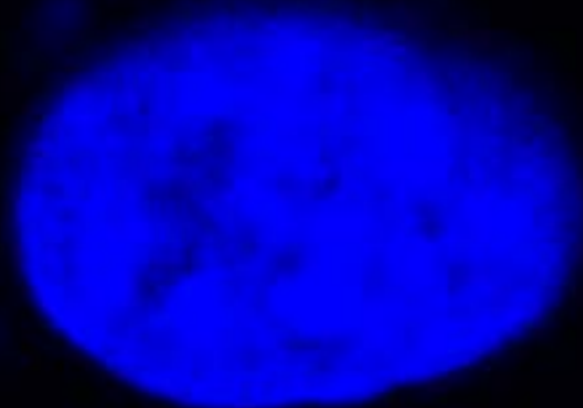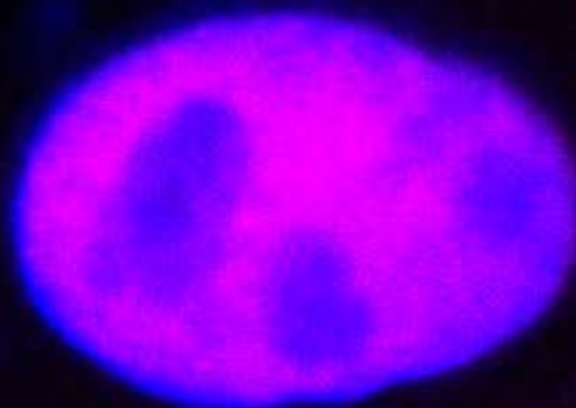

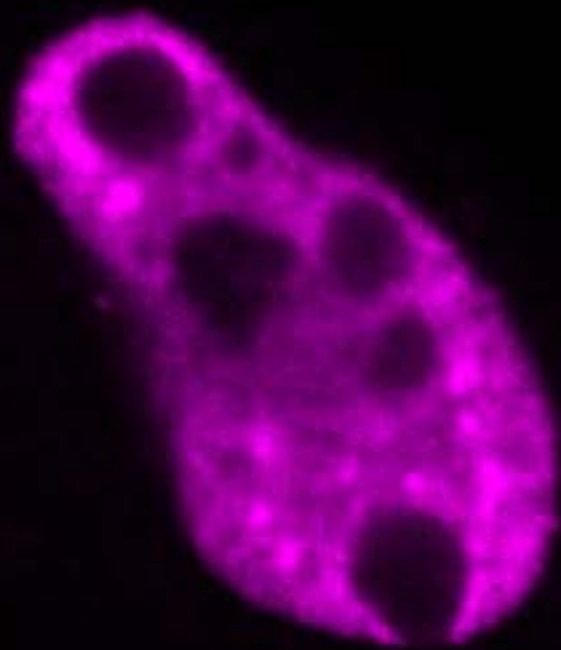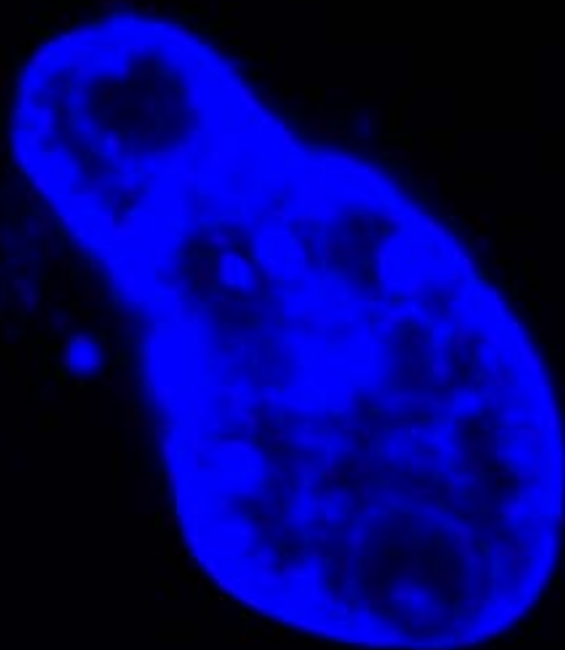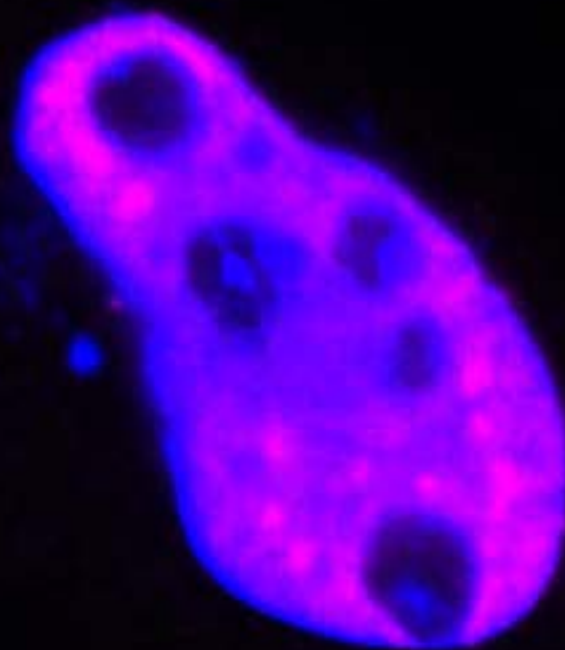

Supplement: EMBJ-35-1254-s006.pdf [file EMBJ-35-1254-s006.pdf]

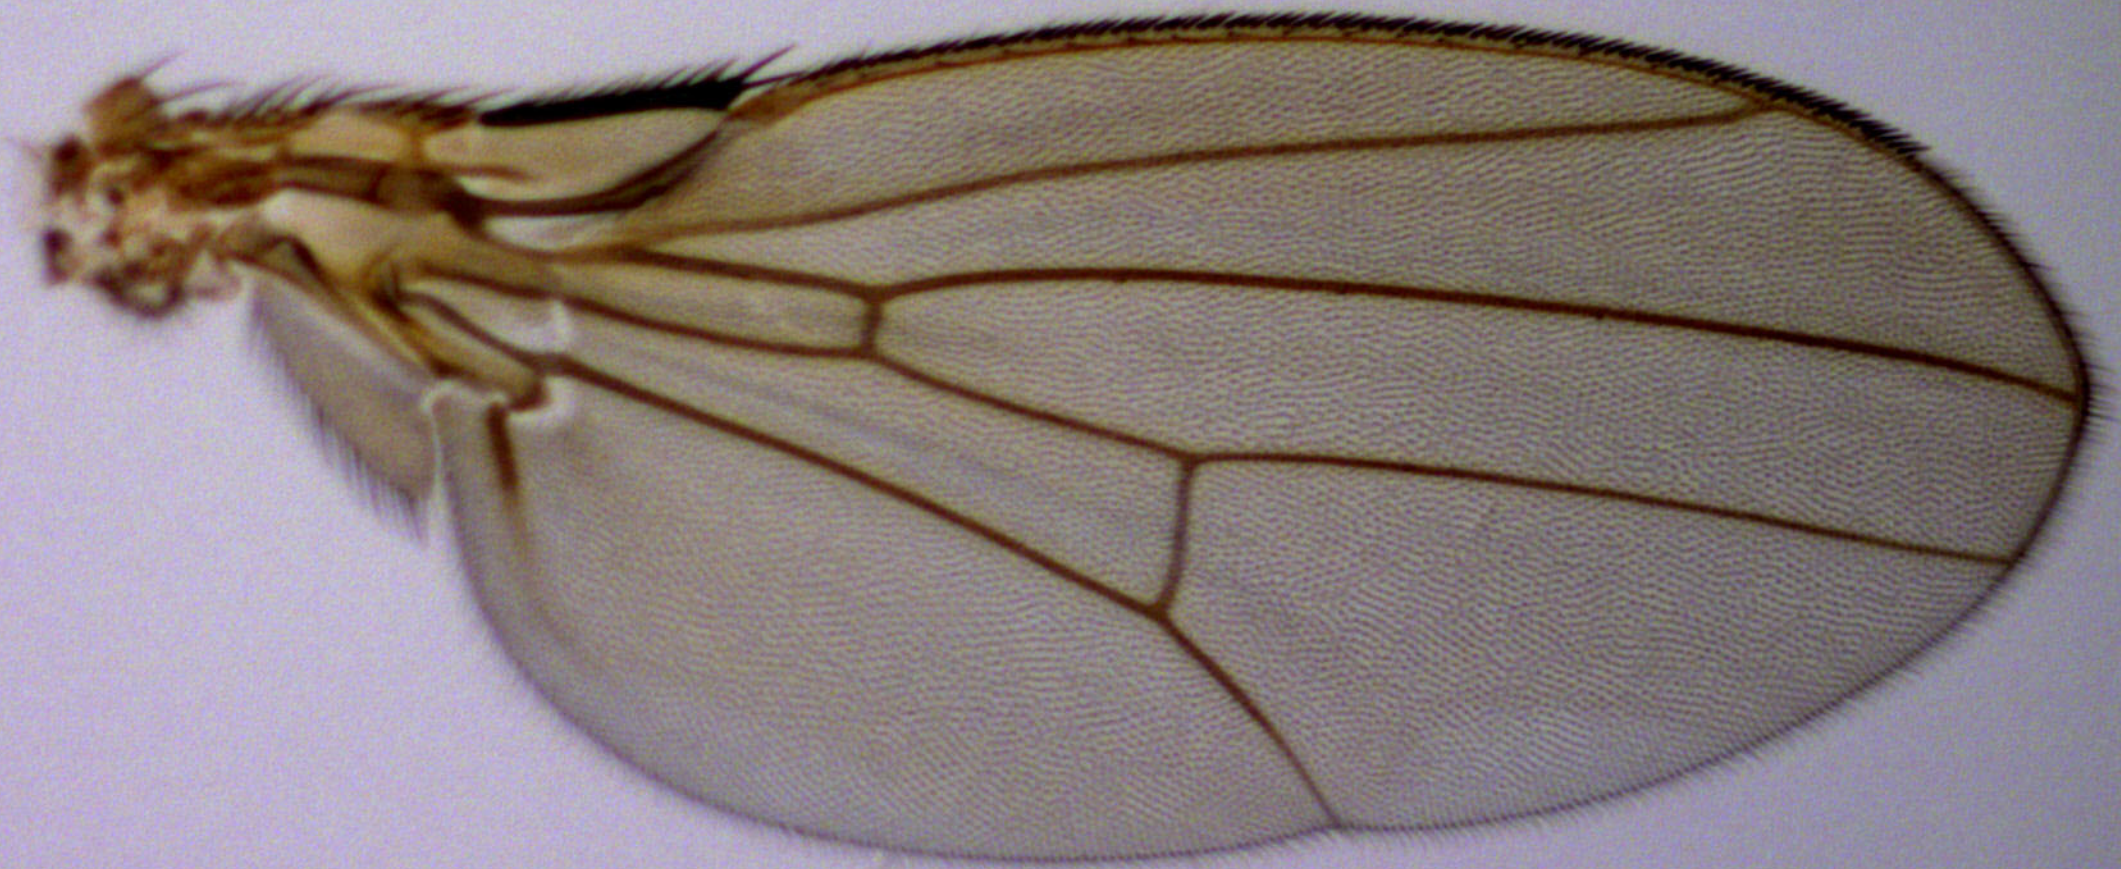

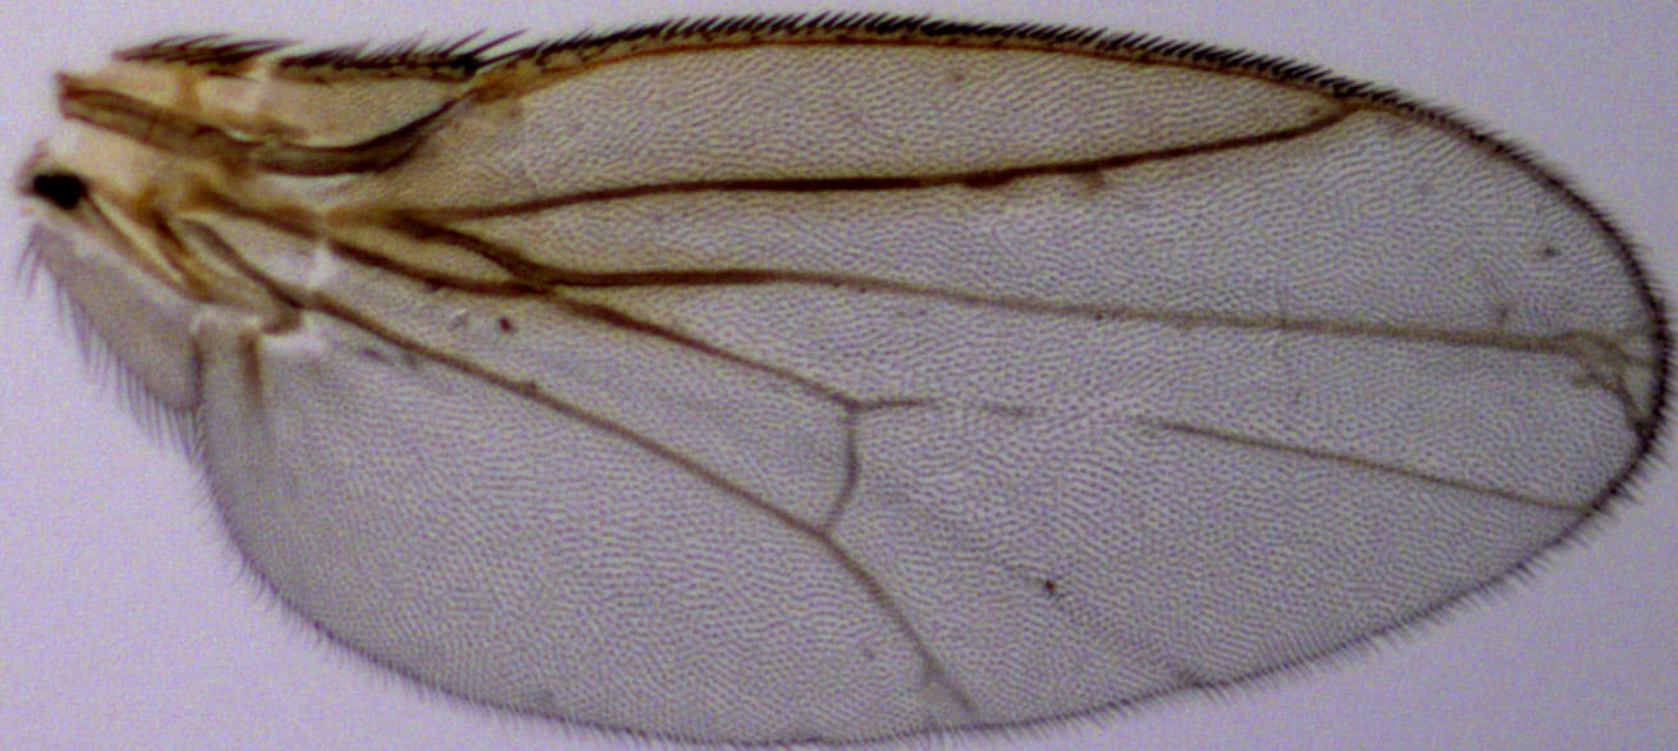

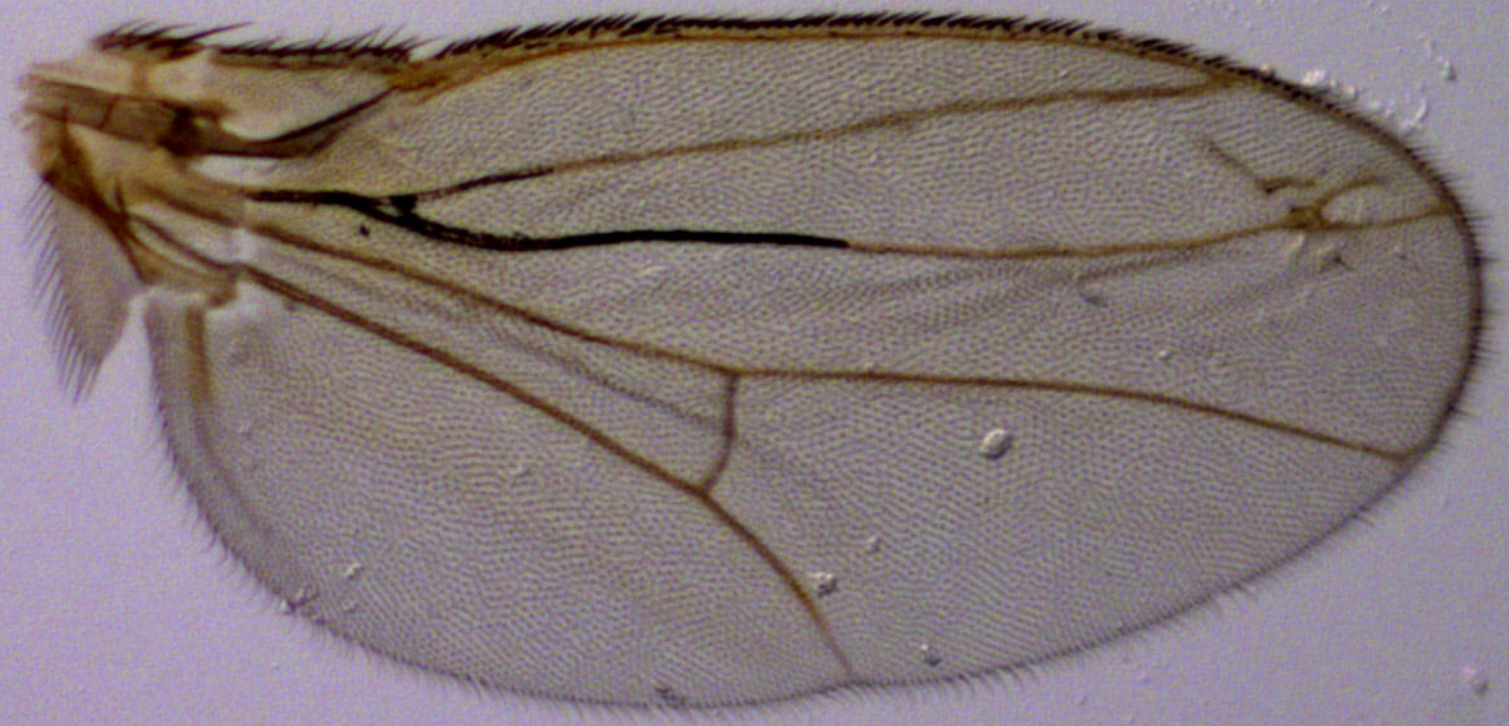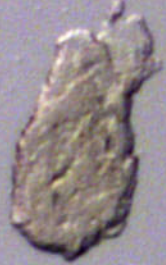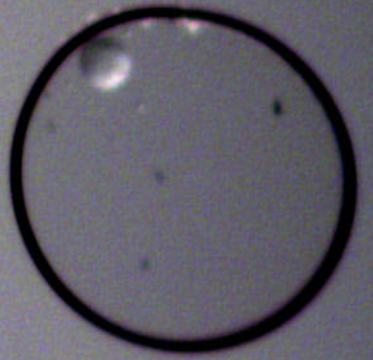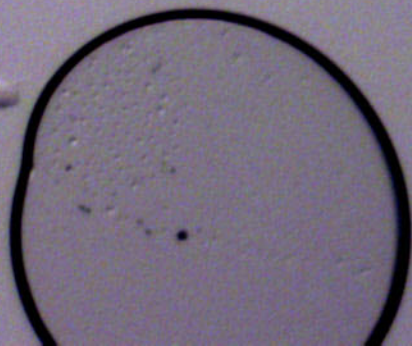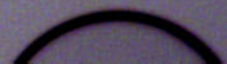

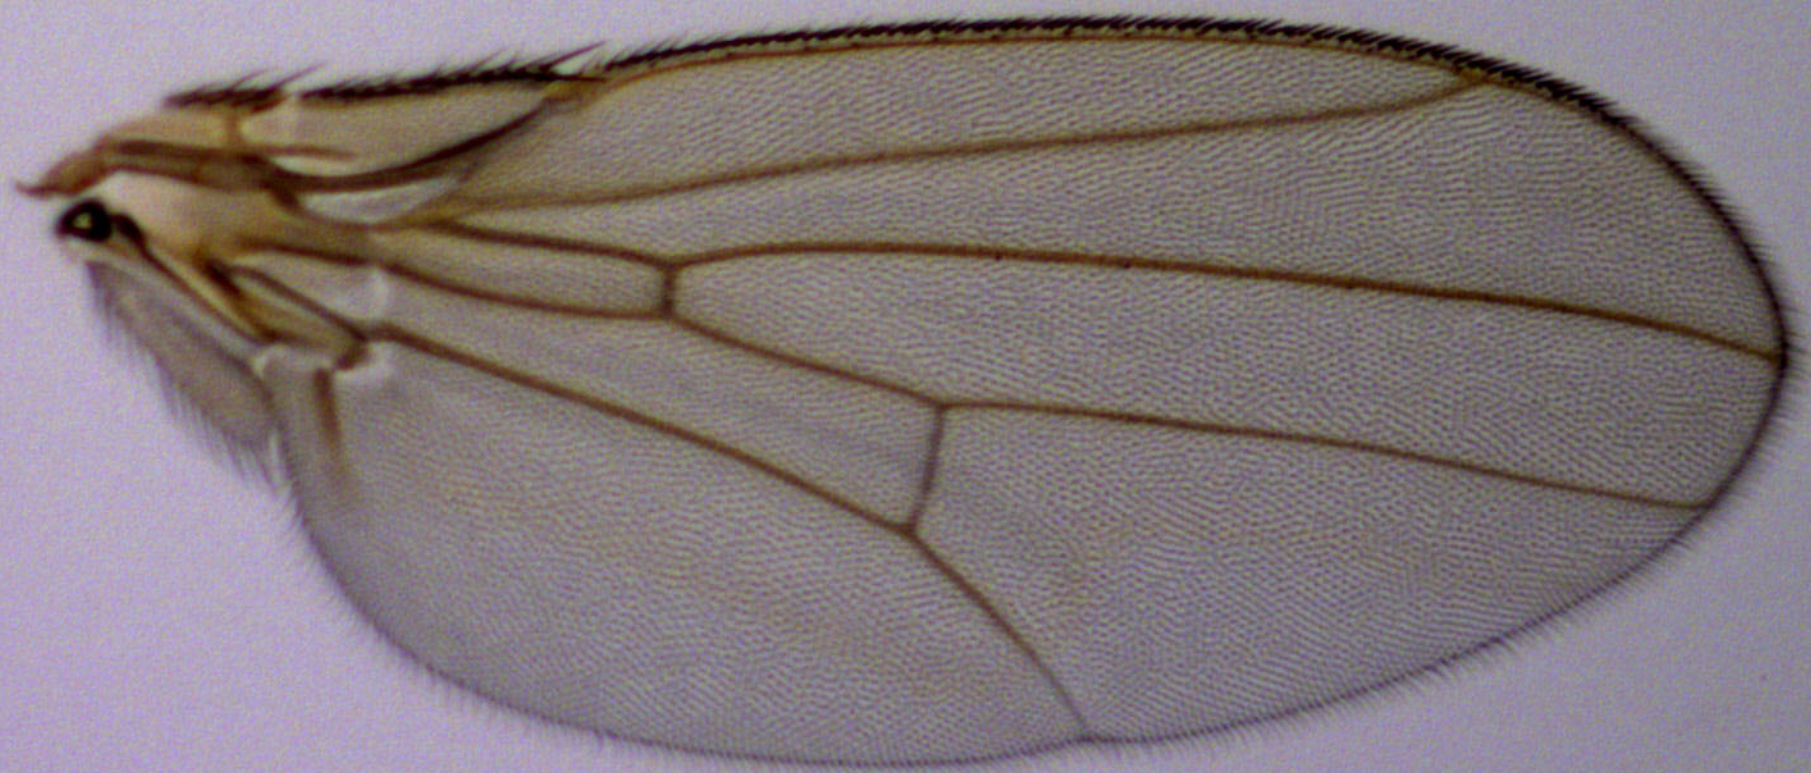

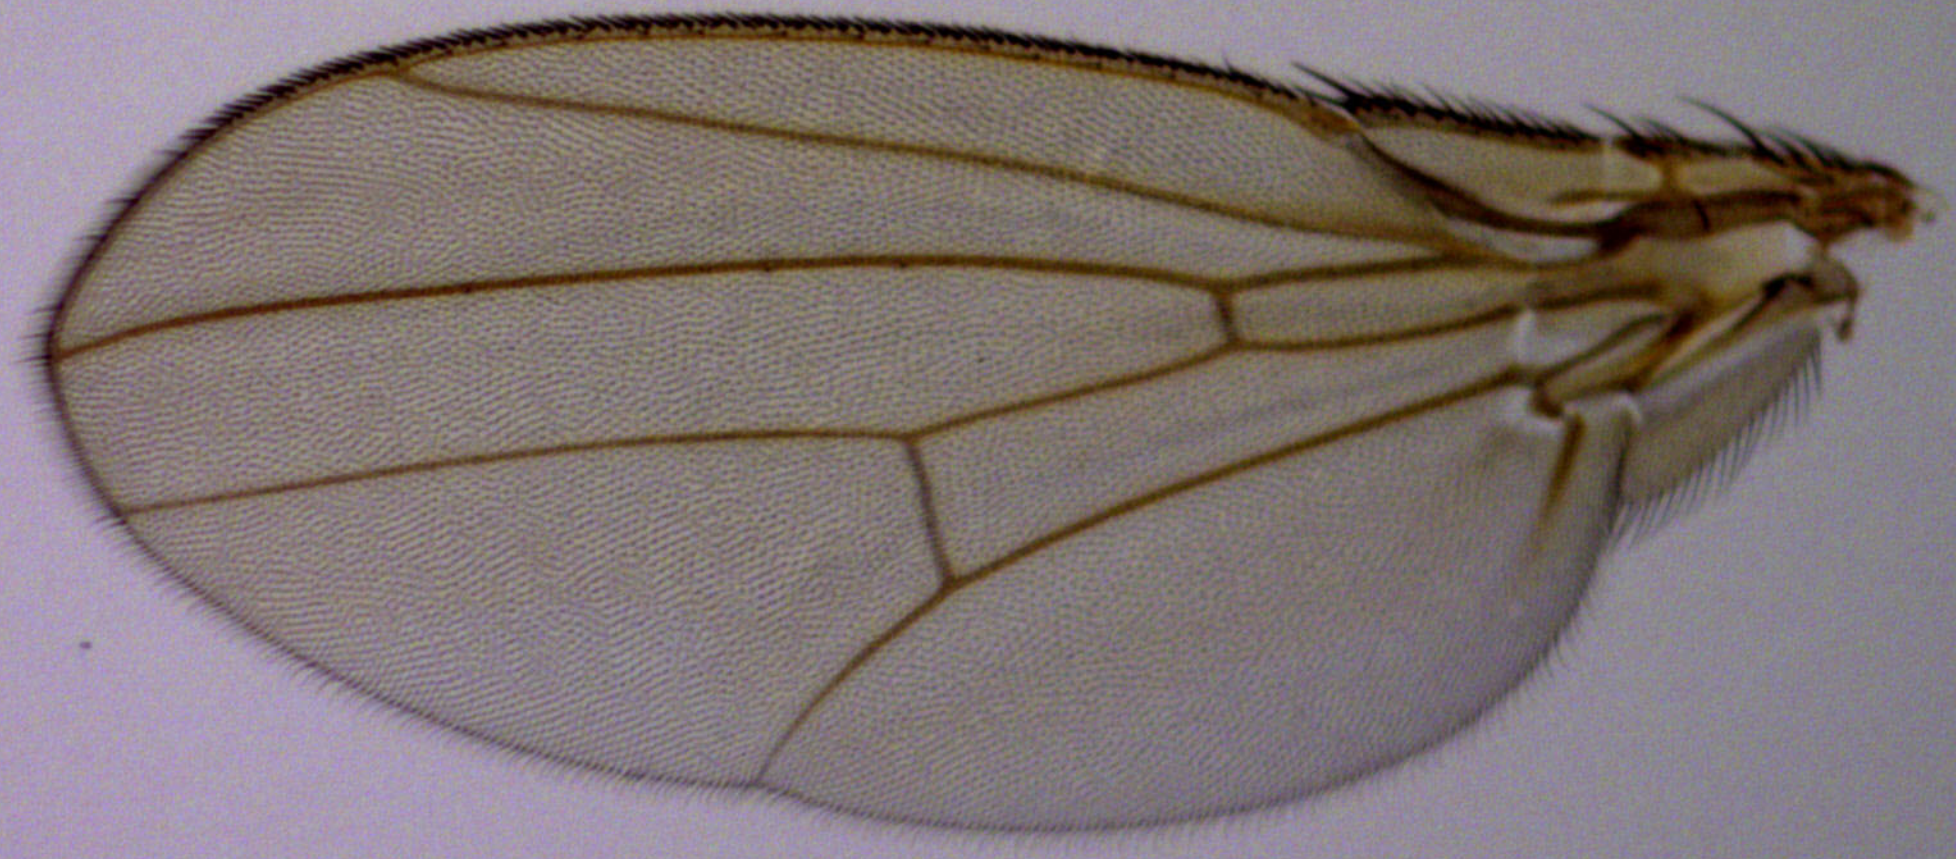

Supplement: EMBJ-35-1254-s007.pdf [file EMBJ-35-1254-s007.pdf]
